## **PRY-1/AXIN signaling regulates lipid metabolism in *Caenorhabditis elegans***

Ayush Ranawade<sup>1§</sup>, Avijit Mallick<sup>1</sup>, and Bhagwati P Gupta

Department of Biology, McMaster University, Hamilton, ON L8S-4K1, Canada

Email ID: [guptab@mcmaster.ca](mailto:guptab@mcmaster.ca), [ayush\\_ranawade@g.harvard.edu](mailto:ayush_ranawade@g.harvard.edu), [mallia1@mcmaster.ca](mailto:mallia1@mcmaster.ca) .

Running title:

PRY-1/Axin role in lipid metabolism.

Corresponding author:

Bhagwati P Gupta, Department of Biology, McMaster University, Hamilton, ON L8S-4K1, Canada. Telephone: 1-905-525-9140 x 26451, Fax: 1-905-522-6066

<sup>1</sup>These authors contributed equally to this work

<sup>§</sup>Current address: Department of Physics, Harvard University, NW256, 52 Oxford St  
Cambridge, MA 02138.

Keywords:

*pry-1*, *axin*, Wnt signaling, lifespan, lipid metabolism, vitellogenin, *C. elegans*

## SUMMARY

The nematode *Caenorhabditis elegans* is a leading animal model to study how signaling pathway components function in conserved biological processes. Here, we describe the role of an Axin family member, *pry-1*, in lipid metabolism. As a central component of the canonical Wnt signaling pathway, *pry-1* acts as a scaffold to multiprotein destruction complex that negatively regulates the expression of Wnt target genes. A genome-wide transcriptome profiling of *pry-1* mutant revealed genes associated with aging and lipid metabolism such as vitellogenins (yolk lipoproteins), fatty acid desaturases, lipases, and fatty acid transporters. Consistent with this we found that *pry-1* is crucial for the normal adult lifespan and maintenance of lipid levels. Knock-downs of *vit* genes in *pry-1* mutant background restored lipid levels, suggesting that Vitellogenins contribute to PRY-1 function in lipid metabolic processes. Additionally, lowered expression of desaturases and lipidomics analysis provided evidence that the fatty acid synthesis is reduced in *pry-1* mutants. In agreement with this an exogenous supply of oleic acid restored depleted lipids in somatic tissues of worms. Overall, our findings demonstrate that PRY-1/Axin signaling is essential for lipid metabolism and involves regulation of yolk proteins.

## INTRODUCTION

Axin was identified initially as a negative regulator of the Wnt-signaling pathway [1]. Subsequently, the role of Axin was studied in other processes as well, and shown to be essential in diverse developmental events, including embryogenesis, neuronal differentiation, and tissue homeostasis [2]. Axin homologs show functional conservation throughout metazoans [3]. As a scaffolding protein Axin plays a key role in the regulation of canonical Wnt pathway function. It contains multiple domains that facilitate homodimerization and interactions with destruction-complex proteins, Dishevelled, APC, and GSK-3 $\beta$  [4, 5]. The destruction complex initiates the phosphorylation and consequent proteolysis of the transcriptional regulator  $\beta$ -catenin, which promotes expression of Wnt target genes [4, 5]. In an ON state, the Wnt-initiated signal inhibits the action of the destruction complex, thereby causing cytoplasmic accumulation of  $\beta$ -catenin, which subsequently translocate to the nucleus and promotes transcription of target genes [4, 6]. Constitutive activation of  $\beta$ -catenin, due to the loss of destruction-complex function, is often associated with cancers and various other disorders affecting the lungs, heart, muscles, and bones [4]. Thus, Axin function is crucial to ensuring precise regulation of  $\beta$ -catenin-mediated Wnt signaling.

The nematode *C. elegans* (worm) is an excellent animal model to investigate the role of Axin and other Wnt pathway components. Similar to the mammalian Axin, PRY-1 in worms interacts with APR-1/APC and GSK-3/GSK-3 $\beta$  to regulate BAR-1/ $\beta$ -Catenin-mediated gene transcription [7]. *pry-1* mutants show defects that are consistent with overactivation of Wnt signaling, such as Q cell migration and vulval induction [7, 8]. As expected, these phenotypes are opposite to those observed in *bar-1* mutants that inactivate Wnt signaling [8, 9].

To understand the mechanism of *pry-1/axin* function a transcriptome profiling was carried out. The analysis of the transcriptomic data uncovered genes associated with different biological processes including aging and lipid metabolism. In agreement with this, *pry-1* mutants have a short lifespan, low brood size, and drastically reduced lipid levels. We focused on a set of differentially regulated genes, specifically yolk lipoprotein vitellogenins (VITs) that are distant homologue of human apolipoprotein B (ApoB) [10] and important for lipid distribution. Previous

studies showed that reducing VITs in wild-type animals increases both lifespan and lipid accumulation, with overexpression having an opposite effect in long-lived mutants [11, 12]. Our results showed that the expression of *vit* genes was upregulated in *pry-1* mutant animals during early larval stages. Moreover, *vit-2* was overexpressed in adults as well. We also found that lowering VIT activity in *pry-1* mutants restored lipids. These results suggest that VITs may be regulated by *pry-1*-mediated signaling to affect lipid levels.

Because lipid contents are affected by changes in the enzymatic activities of lipases and lipid desaturases [13-15], we examined lipid catabolism by measuring lipase activity but observed no detectable increase in lipid utilization. However, the expression of three conserved stearyl-CoA desaturases, *fat-5*, *fat-6*, and *fat-7*, which are involved in the synthesis of monounsaturated fatty acids such as oleic acid (OA) [13-15], was reduced in animals lacking *pry-1* function. In support of this, supplementing the bacterial diet with OA bypassed the requirements of desaturases and partially rescued the lipid phenotype of *pry-1* mutants. Overall, our work demonstrates that the yolk proteins Vitellogenins contribute to PRY-1-mediated function in lipid metabolism.

## RESULTS

### Identification of PRY-1 targets

To gain insights into the mechanism of *pry-1*-mediated signaling, a genome-wide transcriptome analysis was carried out to identify the potential downstream targets. Using RNA-Seq, we identified a total of 2,665 genes (767 upregulated and 1898 downregulated, False Discovery Rate (FDR)  $p$ -adj 0.05) that were differentially expressed in *pry-1(mu38)* animals during the L1 larval stage (Fig. 1A, Table S3, also see Methods). Of these, the transcription of 1,331 genes was altered twofold or more, (FDR,  $p$ -adj 0.05) (248 upregulated and 1083 downregulated) (Table S3). The average and median fold changes in the expression were 2.2 and 2.0, respectively. Figure 1A shows a scattered plot of all expressed genes. A total of 20 genes were also tested by qPCR, which revealed an 85% validation rate (Fig. S1A, B).

We carried out gene ontology (GO) analysis ([www.geneontology.org](http://www.geneontology.org)) to investigate the processes affected in *pry-1(mu38)* animals. Genes with altered expression were found to be enriched in GO

terms associated with determination of adult lifespan, aging, response to unfolded protein, oxidation–reduction process, metabolism, stress response and cell signaling, steroid hormone mediated signaling, lipid metabolic processes, and cellular response to lipids (Fig. 1B, complete list in Table S4). This indicates that *pry-1* plays a role in stress response, lipid metabolism, and lifespan regulation. We also observed enrichment in neuron-related GO terms such as axon, synapse, synaptic transmission, and neuron development. This is expected from the requirements of *pry-1* in neuronal development [7]. Other categories included molting cycle, regulation of transcription, DNA-template, and the reproductive process. In addition to these known categories, the dataset includes many non-annotated genes (Table S3) whose function remains uncharacterized.

The aging-related genes and gene families are overrepresented in our dataset (122 in total, 46% upregulated and 54% downregulated) (Table S3). These include genes that encode extracellular matrix proteins like Collagens (51) and Cuticulin (14), stress-response factors like Glutathione *S*-transferase (23), Heat-Shock Proteins (12), Cytochrome P450s (Cyp) (29), Insulin signaling-related molecules such as Insulin-like peptides (4) and Dod (Downstream of *daf-16*) (4), and yolk lipoprotein VIT/Vitellogenin (6). Of the 16 collagen genes that are essential for lifespan extension and mediated by dauer signaling [16], 54% are present in our dataset (*col-13*, *141*, *144*, *176*, *180*, *61*, *65*, *89*, *97*) (hyp.geo *p*-value 6.12 e-05).

Interestingly, several components of Hedgehog (Hh) signaling are downregulated in *pry-1(mu38)* animals. These include warthog genes *wrt-1* and *wrt-9*; groundhog-like genes *grl-1*, *grl-4*, *grl-5*, *grl-6*, *grl-7*, *grl-13*, *grl-16*, and *grl-21*; hedgehog-like genes, *grd-3*, *grd-5*, *grd-12*, *grd-14*, and *grd-15*; and patched-related genes, *daf-6*, *ptr-1*, *ptr-13*, *ptr-16*, *ptr-19*, *ptr-2*, *ptr-20*, *ptr-21*, *ptr-22*, *ptr-23*, and *ptr-8*. This shows that hedgehog-signaling is affected by *pry-1(mu38)*. Some of these were also recovered earlier in *bar-1* transcriptome studies (see below). The *ptc* and *ptr* genes promote molting and the trafficking of proteins, sterols, and lipids [16, 17]. Interestingly, we found molting and other cuticle-related defects in *pry-1* mutants (e.g., rollers, defective alae, and weaker cuticle) (Mallick *et al.*, unpublished, manuscript in preparation) (Movie S1, S2). These data are consistent with the role of Wnt signaling in cuticle development [18].

We noticed alterations in the expression of some of the Wnt pathway components as well. For example, *pry-1* was upregulated 1.3-fold (Table S3, Fig. S1A). Although such upregulation of *pry-1* was not reported earlier in *pry-1* mutants, previous studies have shown that Axin is a target of Wnt signaling and its expression is increased in overactivated Wnt backgrounds [5, 18-20]. This, together with our finding, suggests that the positive regulation of Axin by the canonical Wnt signaling pathway is a conserved mechanism in eukaryotes. Other Wnt pathway components that are differentially expressed in *pry-1(mu38)* included *mom-2/wnt* (1.5-folds up), *cfz-2/fz* (1.7-folds down), *lin-17/fz* (1.6-folds up) and *pop-1/tcf* (1.7-folds up) levels (Table S3).

A comparison of *pry-1* targets with three previously reported Wnt transcriptome microarray datasets, *bar-1(null)* [21] and constitutively active *bar-1 (dNT-bar-1)*, a small deletion that removes part of the N-terminus) [18, 20], revealed shared genes and families. Of the two *dNT-bar-1* studies, one was specific to the vulva and seam cells [22] and the other involved whole animal analysis [18]. A total of 12% [20], 18% [21] and 30% [18] *bar-1* targets overlapped with our *pry-1* set (Fig. 1C, Table S5). The shared targets included genes involved in cuticle synthesis (*col* and *cutl* families), defense response, embryo development, oxidation–reduction processes and proteolysis. The *hh* family members are also shared between the *pry-1* and *bar-1* targets. Altogether from the three *bar-1* studies mentioned above, 10 *hh* target genes, namely *grl-5*, *grl-10*, *grl-14*, *grl-15*, *hog-1*, *grd-1*, *grd-2*, *grd-12*, *wrt-4*, and *wrt-6* are reported, three (*grl-5*, *grl-14*, and *grd-12*) are present in our *pry-1* target list. The common targets of *bar-1* and *pry-1* (Fig. 1C, Table S5) may act downstream of the canonical Wnt signaling pathway

Because *bar-1*/β-catenin was previously shown to interact with *daf-16* to regulate lifespan in *C. elegans* [23], we compared the *pry-1*/Axin targets with genes that show altered expression in *daf-16/foxo* mutants. From different studies involving DAF-2/IGF receptor and DAF-16/FOXO targets, an overlapping set of 37 genes has been identified and termed as “core” DAF-16 targets [24]. These target genes are activated in *daf-2* mutants. Of these, 18 are present in our *pry-1* set (Fig. 1C), although only 8 are upregulated (Table S5). While the biological roles of most of these 18 genes are unknown, some appear to encode enzymes such as esterase, desaturase, and cystatin

(Table S5). Thus, *pry-1* may utilize a different mechanism to regulate a subset of DAF-16/FOXO-mediated insulin pathway core targets to affect lifespan.

### ***pry-1* mutants are short-lived, and exhibit altered lipid metabolism**

The presence of several aging-related genes in the *pry-1(mu38)* transcriptome led us to examine lifespan phenotype. We found that *pry-1(mu38)* animals are severely short lived with an 80% decrease in the mean lifespan (Table 1, Fig. 2A). Although *pry-1* transcription is higher in these animals (see above), the aging defect is likely caused by the loss of *pry-1* function due to the nonsense nature of *mu38* allele. A similar phenotype was observed in a CRISPR mutant *pry-1(gk3682)* as well (Table 1, Fig. 2A). The RNAi experiments also caused a reduction in lifespan. Specifically, mean lifespans were reduced by 18-29% when treated from the embryonic stage and 22-31% when treated during adulthood (Table 1, Fig. 2B, also see Methods). It should be noted that RNAi effects are less severe compared to mutants, possibly due to the partial KD of *pry-1* activity and negative autoregulation of *pry-1* transcription (see Fig. S1A). Therefore, we conclude that *pry-1* is important for the normal lifespan of *C. elegans*.

Throughout the lifespan of an animal, lipids are persistently mobilized to afford energy demands for growth, cellular maintenance, tissue repair, and reproduction [25, 26]. Changes in lipid levels affect an organism's ability to survive in stressful conditions. For example, exposure of animals to oxidative stress causes mobilization of somatic fat to germline as a mechanism to balance survival and reproduction [27, 28]. Many genes that are involved in the synthesis, breakdown and transport of lipids are differentially expressed in *pry-1* mutants (Fig. S2 - lipid metabolism). These include vitellogenin (yolk protein/apolipoprotein-like): *vit-1*, -2, -3, -4, -5, and -6; fatty acid transporters: *lbp-1*, -2, -4, -5, -7, and -8; lipases: *lips-3*, -4, -7, -10, and -17; desaturases: *fat-4*, -5, and -6; elongases: *elo-3* and -6; and fatty acid oxidation: *acd-1*, -6, -11, -23, *acs-2*, -11, and -17, *cpt-1*, -4, and *ech-9* (Table S2). The expression of *vit* genes and desaturase was measured by qPCR and all but *fat-4* were successfully validated (Fig. S1A, B). The *fat-4* levels were down by 20%, unlike the 1.5-fold increase observed by RNA-Seq. We also tested another desaturase, *fat-7*, that functions redundantly with *fat-6* [29] but was not present in our dataset. *fat-7* mRNA levels were

below the limit of detection (Fig. S1A). Thus, all four fat desaturase genes are downregulated in *pry-1(mu38)* animals.

Enrichment of several lipid metabolism genes in the *pry-1* transcriptome led us to examine lipid accumulation in worms. Staining with Oil Red O revealed that the lipid content was less than half in *pry-1(mu38)* one-day young adults compared with controls (Fig. 3A, B). Examination of total fat at each larval stage revealed that *pry-1* mutants have lower somatic lipid stores (25–80%) at all stages except for L2 (Fig. S3A). In addition, the lipid distribution was altered such that the staining was mostly restricted to gonadal tissue (Fig. 3C). These results suggest that *pry-1* plays a role in lipid metabolism. Consistent with this we found that *pry-1(mu38)* animals lay fewer fertilized eggs and have poor survival upon starvation-induced L1 diapause (Fig. 3E, F).

One explanation for reduced lipid phenotype could be that lipids are being rapidly utilized. This is unlikely because several lipases (*lips* family members, mentioned above) are downregulated. We also measured total lipase activity in one-day-old adults from whole worm lysates. As expected, the total lipase activity was 34% lower in the mutant compared with the N2 control (Fig. 3D). Next, we examined lipids in *pry-1(mu38)* animals following knock-down of *lipl-4* or *lips-7*, lipase genes that regulate the gonad dependent somatic lipid levels [25, 26, 30] but observed no change in the pattern of lipid distribution (Fig. 3G, H). We conclude that lower somatic lipids in animals lacking *pry-1* function are not due to increased utilization, raising the possibility of the involvement of other metabolic processes.

### **Vitellogenins contribute to lipid metabolism defects in *pry-1* mutants**

To understand the molecular basis of low lipid levels in *pry-1(mu38)* worms we focused on the vitellogenin family of genes whose expression is repressed by *pry-1*. VITs are the major yolk proteins in *C. elegans* that are synthesized in the intestine and mediate lipid transport from the intestine to the gonad during the reproductive period [31]. Examination of *vit* levels in *pry-1(mu38)* animals revealed abnormal expression at all developmental stages. Thus, starting with the L1 stage where all six *vit* genes were upregulated, the number of overexpressed genes was five in L2, two in L3 and zero in L4 stage (Fig. 4).



Next, lipid contents in *pry-1(mu38)* worms were examined following RNAi-mediated KDs of individual *vit* genes. Previously, *vit* RNAi in wildtype animals was shown to cause accumulation of lipids in the intestine [12]. We found that *pry-1* mutants had altered lipid distribution in all cases such that lipids accumulated at higher levels in somatic tissues (Fig. 5A, B, Fig. S3B). A quantification of overall lipids revealed a significantly higher accumulation in mutants (2.5 - 3 fold) compared to wildtype N2 (1.3 - 1.4 fold) (Fig. 5A, B, Fig. S3B). We also compared *vit* genomic sequences used to perform KD experiments, which revealed that *vit-1* RNAi also targets *vit-2* due to significant identity (Table S6, Fig S4). Likewise, any one of the *vit-3*, 4 or 5 RNAi can simultaneously KD the other two (Table S6). Thus, multiple VITs play roles in the regulation of both lipid levels as well as its distribution and their misregulation contributes to lipid metabolism defects in *pry-1* mutants.

### **Lipid defect in *pry-1* mutants does not involve the lipoprotein receptors *rme-2* and *lrp-2***

We wanted to understand how *pry-1* and *vit* genes might work to regulate lipid levels. Because VITs are transported via the RME-2 receptor [31], we examined the involvement of *rme-2* in the *pry-1*-mediated pathway to regulate lipid accumulation. The knock-down of *rme-2* by RNAi led to intestinal accumulation and ectopic deposition of lipids (Fig. 5C, D) due to blockage of yolk protein transport to the developing oocytes [31]. Specifically, *rme-2*(RNAi) animals showed an approximately 45% increase in total lipid content such that the gonad-to-somatic ratio was roughly 30% lower compared with controls. However, this phenotype was not observed in *pry-1(mu38)* due to a reduction in lipid levels both in somatic and gonadal tissues (Fig. 5C, D). These results allow us to suggest that VITs act independently of the RME-2 transport mechanism to regulate lipid metabolism in response to *pry-1* signaling. Moreover, since lipid levels are further reduced in *pry-1(mu38)* animals following *rme-2* KD, it may be that *rme-2* has an unknown non-vitellogenin-mediated role in lipid accumulation. There may also be other possibilities for such a phenotype.

We also examined the possibility of other VIT-interacting factors that might be involved in PRY-1-mediated regulation of lipid levels. Our transcriptome dataset contained one LDL-like receptor

gene *lrp-2* that was overexpressed in *pry-1* mutants (Supplementary Table S3). It was shown previously that *lrp-2* positively regulates yolk protein synthesis [32]. To test whether lipid levels are affected by *lrp-2*, RNAi KD experiments were performed, which showed a small but significant rescue of lipid phenotype in *pry-1(mu38)* animals (Fig. 5E, F). However, since *lrp-2* KD in wildtype animals also caused a similar increase in lipids, it is unclear whether PRY-1-mediated signaling involves LRP-2 function to affect lipid levels.

### **Fatty acid levels are reduced in *pry-1* mutants**

As discussed earlier, the *pry-1* transcriptome includes genes predicted to participate in fatty acid desaturation and elongation (5), fatty acid binding/transport (6), and fatty acid  $\beta$ -oxidation (14) pathway (2) (Fig. S2). The expression of all four  $\Delta 9$ -desaturase genes is downregulated in *pry-1* mutants. These enzymes are required to produce C16:1 and C18:1 monounsaturated fatty acids (Fig. S2). Whereas *fat-5* converts palmitic acid (C16:0) to palmitoleic acid (C16:1n7), *fat-6* and *fat-7* are involved in stearic acid (C18:0) to OA (C18:1n9) conversion [14]. Although mutations in single  $\Delta 9$ -desaturase genes cause reduced FA synthesis, they do not give rise to a significant visible phenotype because of a compensatory mechanism, however double and triple mutants have severe defects, including lethality [14].

Because the expression of all three fat genes depends on nuclear hormone receptors *nhr-49* and *nhr-80* [15, 33], we determined levels of both these NHR transcripts in *pry-1* mutant animals. Although RNA-Seq transcriptome data showed no change in *nhr-49* and *nhr-80*, qPCR experiments revealed that *nhr-80* transcription showed a subtle but significant upregulation whereas *nhr-49* was unchanged (Fig. S1B). Thus, transcriptional regulation of these two nuclear hormone receptors is unlikely to be a mechanism affecting *pry-1*-mediated expression of  $\Delta 9$ -desaturase genes, although we cannot rule out the possibility that activities of one or both may be regulated post-transcriptionally in response to PRY-1 function.

The changes in the expression of  $\Delta 9$ -desaturases can lead to reduced FA synthesis in *pry-1(mu38)* animals. To investigate this, we quantified lipid levels by gas chromatography–mass spectrometry (GC–MS) approach. The results showed that while the relative ratios of fatty acids in *pry-1* mutants

are normal, the absolute level of each species is significantly reduced (Fig. 6A, Fig. S5). The result agrees with the overall low lipid levels in *pry-1(mu38)* animals and together supports the important role of PRY-1 signaling in lipid metabolism in *C. elegans*.

### **Oleic acid (18C:1n9) supplementation partially rescues the somatic depletion of lipids in *pry-1* mutants**

One of the fatty acid species that showed 50% reduced levels in our GC–MS analysis is OA. OA is required for fatty acid metabolism and is synthesized by *C. elegans* as it cannot be obtained through the normal *E. coli* (OP50) diet. OA acts as a precursor for the synthesis of polyunsaturated fatty acids and triacylglycerides, which are used for fat storage [13]. The addition of exogenous OA as a fat source has been shown to rescue several fat-deficient mutants, including *fat-6* and *fat-7* by restoring their fat storage, resulting in improved fertility and increased locomotion [29]. Moreover, the addition of OA in *sbp-1*, *fat-6*, and *fat-7* animals fully rescued defects in satiety quiescence [14, 15, 34]. In the context of lifespan OA has been shown recently to impart beneficial effects [35], which may involve hormesis mechanism due to elevated activities of genes such as glutathione peroxidase, catalase, and superoxide dismutase [28]. We, therefore, reasoned that supplementation of OA may improve lipid levels in *pry-1(mu38)* mutants. Treatment with 1 mM OA resulted in the restoration of lipids in animals lacking *pry-1* function (up to twofold higher compared with the untreated control, Fig. 6B, C). No significant changes were seen in the gonadal lipid levels, suggesting that lipid metabolism in the gonads was unaffected. In addition to restored lipid levels, OA-treated *pry-1(mu38)* mutants showed a 1.3-fold increase in lifespan (Table 1, Fig. 6D).

## **DISCUSSION**

Wnt pathway components are involved in cellular senescence, tissue aging, and nutrient metabolic processes. However, the mechanism by which the pathway affects these various processes is not well understood. Here, we investigated the role of *pry-1*/Axin, a negative regulator of Wnt signaling, and provide evidence for its important role in the maintenance of lipid metabolism through regulation of vitellogenesis.

### ***pry-1* regulates expression of genes involved in lipid metabolism**

The transcriptome profiling of *pry-1* mutants revealed altered expression of many genes including those that affect hypodermis, stress-response, aging, and lipid metabolism. The hypodermal-related genes include collages, cuticulins, and hedgehogs. Previously, expression of some of the hedgehog genes was found to be altered in *bar-1* mutants [20, 21]. Considering that cuticular defects are observed in *bar-1* [18, 20] and *pry-1* mutants (Mallick *et al.*, manuscript in preparation), and that hedgehog family members play roles in cuticle shedding and formation of alae [17], these results lead us to suggest that a genetic pathway involving *pry-1* and *bar-1* interacts with hedgehogs for normal cuticle development.

One of the key findings of our *pry-1(mu38)* transcriptome analysis is the enrichment of genes related to lipid metabolism. We found that multiple lipogenic and lipolytic genes had altered expression. For example, all four fatty acid desaturases ( $\Delta 5$  and  $\Delta 9$  desaturases) were downregulated in *pry-1* mutants. While single fat gene mutants affect fatty acid composition without altering overall lipid levels, double mutants have a low lipid level [14, 29], suggesting that *pry-1* positively regulates fatty acid synthesis. With regards to lipolytic genes, such as those involved in beta-oxidation, changes in gene expression between peroxisomal and mitochondrial beta-oxidation genes had an opposite trend (4 of 5 upregulated and 8 of 11 downregulated, respectively). This may indicate selective utilization of long-chain fatty acids over short-chain fatty acids by the *pry-1* pathway. We also observed that all four lipases (*lips* family) are downregulated, including *lips-7* which was earlier shown to be involved in lifespan extension and the maintenance of lipid levels [30]. Although *lips-7* did not alter the *pry-1(mu38)* phenotype, it remains to be seen whether *pry-1* regulates any, or all, of the remaining three *lips* gene(s) to modulate lipids.

In addition to lipogenic and lipolytic genes, several lipid transporters are also present in the *pry-1(mu38)* transcriptome, including two lipid-binding proteins (*lbp-5* and *lbp-8*; both downregulated), six lipoproteins (*vit-1* to *-6*; all upregulated) and a LDL-like receptor protein (*lrp-2*). Knock-downs of *lbp-5* and VITs negatively affect lipid storage [36], which further emphasizes

the important role of *pry-1* in the maintenance of lipids and suggests that the *pry-1*-mediated signaling is involved in utilization of lipids for energetics as well as signaling mechanisms.

### **PRY-1-mediated lipid metabolism involves Vitellogenins**

Reduced lipids may affect tissue function and physiology in different ways, for example, due to altered membrane structure and compartmentalization, altered signaling, reduced energy demands, and impact on autophagy. The Oil Red O staining of *pry-1(mu38)* showed a severe reduction in lipid content with a marked decline in the somatic lipid storage. This phenotype was also observed in *dNT-bar-1* animals that carry a constitutively active form of BAR-1 (Fig. S6A, B). Together these findings suggest that *pry-1-bar-1* pathway is involved in lipid metabolism. Earlier, a somatic lipid depletion phenotype was reported in the *skn-1* gain of function mutant and H<sub>2</sub>O<sub>2</sub>-treated wild-type animals [27]. However, unlike *pry-1* and *bar-1*, defects in these cases were observed near the end of the reproductive senescence (termed age-dependent somatic depletion of fat or asdf).

One possibility for reduced lipids in *pry-1* and *bar-1* mutants may be due to elevated breakdown of lipids. We investigated this issue in *pry-1* mutants and found no increase in total lipase activity. Moreover, KDs of *lipl-4* (lysosomal lipase) and *lips-7* (cytosolic lipase) in *pry-1(mu38)* — both of which negatively regulate lipid levels [25, 26] — had no observable effect. Thus, selective and rapid lipid catabolism does not appear to be a factor in lipid depletion in the absence of *pry-1* function. We then investigated the role of VIT proteins in maintaining lipid levels. As major yolk proteins, VITs are involved in somatic mobilization of lipids to the developing germline. *pry-1* mutants show misregulation of all six *vit* genes such that they are overexpressed in L1 but decline thereafter with all being downregulated by the L4 stage. Interestingly, *vit-2* levels were found to be significantly higher in adults. As expected, the low lipid phenotype of *pry-1* mutant animals was suppressed by knocking down *vit* genes (*vit-1/2* and *vit-3/4/5*) providing evidence that VITs play an important role in PRY-1-mediated lipid metabolism. We have also shown that such a role of VITs may not utilize lipoprotein receptors RME-2 (VIT transporter) and LRP-2 (VIT synthesis). Overall, these findings along with the role of VITs in regulating lipid levels [12], allow us to propose that PRY-1-mediated signaling involves VITs to regulate processes that depend on energy metabolism and lipid signaling [25, 26].

While it remains unclear how VITs participate in *pry-1* signaling, one possibility may involve downregulation of the autophagy pathway. Manipulating VIT levels has been shown to affect the lifespan by altering autophagy [12]. Autophagy is a complex process that involves multiple enzymes to recycle cellular contents by converting them into usable metabolites. Although the *pry-1* transcriptome did not contain known autophagy-related candidates, the pathway may still be involved. This could be tested by examining the roles of specific autophagosome genes in lipoprotein synthesis and autophagy, which in turn should reveal a link between *pry-1*-mediated lipid metabolism.

Another possibility for low lipid levels in *pry-1* mutants may be due to reduced fatty acid synthesis. To this end, our GC-MS analysis of fatty acid composition revealed that *pry-1* is needed to maintain normal levels of every fatty acid species analyzed. A global reduction in fatty acids due to the loss of *pry-1* function may affect processes that require utilization of lipids such as aging that is supported by short lifespan of *pry-1* mutants. However, it should be noted that previous studies examining lipid levels in lifespan defective mutants have found no clear relationship between fat content and longevity. For example, *daf-2* and *nhr-49* mutants have high fat but their lifespan phenotypes are opposite (*daf-2* are long lived and *nhr-49* short lived) (reviewed in [25, 26]). The lifespan extension phenotype is also observed in mutants with reduced fat content, such as dietary restricted *eat-2* [37]. Thus, instead of absolute levels, the quality of lipids may be more important [28]. We investigated this using OA, one of the species involved in fatty acid signaling. Exogenous treatment with OA restored lipid levels as well as partially rescued lifespan defect in animals that lack *pry-1* function. Thus, *pry-1* may play a role in maintaining the levels of beneficial fatty acids. How then might the *pry-1-vit*-mediated pathway affect lipid levels? It may be that lipid synthesis and storage processes are compromised. This is in part supported by reduced expression of desaturases, however, additional mechanisms are also likely to be involved, such as reduced conversion of acetyl-CoA to saturated fatty acid (palmitate), lower synthesis of diglycerides, and increased peroxisomal beta oxidation (Fig. S2). It would be interesting to examine these possibilities in the future.

Our study provides the first evidence of PRY-1/Axin function in lipid metabolism. The involvement of lipids in age-related disorders in humans, as well as animal models, is well documented. Genetic and acquired lipid diseases are associated with loss of subcutaneous fat, accumulation of visceral and ectopic fat, and metabolic syndromes such as insulin resistance, glucose intolerance, dyslipidemia, and hypertension [38]. Yang et al. showed that Axin expression in mice contributes to an age-related increase in adiposity in thymic stromal cells [39](Yang *et al.* 2009). Although our data shows that PRY-1/Axin is not likely to affect fat storage, whether Axin family members play roles in any of these lipid-related diseases is unknown. Therefore, findings that PRY-1/Axin is necessary for the maintenance of lipid levels provide a unique opportunity to investigate the role of Axin signaling in age-related lipid metabolism.

## EXPERIMENTAL PROCEDURES

### Strains

Worms were grown on standard NG-agar media plates using procedure described previously [40]. Cultures were maintained at 20 °C unless mentioned otherwise. The *pry-1* CRISPR allele, VC3710 *pry-1(gk3682)*, was generated in Moerman lab and will be described elsewhere. All other mutants were obtained from CGC. The strains were outcrossed at least three times before doing the experiments. The genotypes of cultures used in this study are: N2 (wild-type), AF16 (wild-type), DY220 *pry-1(mu38)I*, EW15 *bar-1(ga80)X*, PS4943 *huIs[dpy-20;hsp16-2::dNT-bar-1]*; *syIs148*, KN562 *pop-1(hu9)I*; *mulS32II*, DY250 *cbr-pry-1(sy5353)I*, RB1982 *vit-1(ok2616)X*, RB2365 *vit-2(ok3211)X*, RB1815 *vit-3(ok2348)X*, RB2202 *vit-4(ok2982)X*, RB2382 *vit-5(ok3239)X*.

### Molecular Biology and transgenics

Primers used in this study are listed in Table S1. The *pry-1p::pry-1::GFP* transgenic strain DY596 was created by injecting 100 ng/ml of the pDC10 plasmid into the *pry-1(mu38)* animals. The plasmid was kindly provided by Korswagen lab and has been described earlier [7]. Briefly, it contains the full coding sequence of *C37A5.9/pry-1* along with 3.6 kb of upstream region inserted in-frame into the *gfp* reporter containing vector pPD95.81. The *pry-1* RNAi plasmid pGLC142 (termed plasmid #2) was constructed by inserting a genomic fragment of 2.3kb into the L4440

vector using restriction enzymes *HindIII* and *XmaI*. The fragment was obtained by PCR using the primers GL1343 and GL1344.

For qRT-PCR experiments mRNA was extracted from bleach synchronized worms by Tri-reagent (Catalog Number T9424, Sigma-Aldrich Canada) according to the manufacturer's instructions. cDNA was synthesized from total RNA using oligo (dT) primers and other reagents in the ProtoScript® First Strand cDNA Synthesis Kit (Catalog Number E6300S, NEB, Canada). Quantitative real-time PCR (qRT-PCR) analysis was performed on a CFX 96 BioRad cyler in triplicate with SensiFAST™ SYBR® Green Kit (Catalog Number BIO-98005, USA), according to the manufacturer's instructions. *pmp-3* was used as a reference gene in all assays. CFX manager was used for the Ct and *p*-value calculations. At least three replicates were performed for each assay.

## **RNAi**

For RNAi experiments, *E. coli* HT115 expressing target specific dsRNA were grown on plates containing  $\beta$ -lactose [41]. Worms were bleach synchronized and seeded onto plates. After becoming young adult, worms were transferred to fresh plates every other day and numbers of dead worms recorded. For adult specific RNAi, synchronized worms were cultivated on NGM/OP50 plates until the young adult stage and then transferred to the RNAi plates.

*pry-1* RNAi was carried out using two different plasmids, one of which was from Ahringer library (termed plasmid #1) and the other was created as part of this study (termed plasmid #2, see Molecular Biology section above). Except for data presented in Fig. 2B, for which plasmid #2 was used, all other *pry-1* KD experiments were performed using plasmid #1.

## **Microscopy and quantification**

Animals were paralyzed in 10 mM Sodium Azide and mounted on glass slide with 2% agar pads and covered with glass coverslips for immediate image acquisition using Image NIS Element software (Nikon, USA) with a Hamamastu Camera mounted on a Nikon 80i upright microscope. For GFP and autofluorescent age-pigment analysis excitation 470/40 nm and for emission 525/50 nm wavelengths were used. Each experiment was repeated at least two times with similar outcome.



For the lipofuscin assay, fluorescence intensity of individual worms was determined using ImageJ software. For acquisition of PRY-1::GFP fluorescence micrographs Zeiss Apotome was used. Quantification of pixel densities for GFP reporters was performed with Image J™. Fluorescence of *hsp-6::gfp* and *hsp-16::gfp* was examined by analyzing the degree of GFP intensity. The animals were categorized into three arbitrary states, i.e., low, medium, or high, based on GFP fluorescence and the proportion of animals for each of these was plotted.

### **Lifespan assay**

Lifespan analyses were carried out as prescribed [11] at 20 °C unless otherwise indicated on NG-media plate devoid of Fluorodeoxyuridine (FUDR). Young adult worms (day zero for lifespan) were plated and transferred to new seeded plates every alternate day during the reproductive period to avoid over-crowding due to progenies and following transfers were done when necessary. Animals were scored every alternate day and animals that did not respond to repeated prodding with the pick were counted as dead. Results are expressed as mean life span  $\pm$  SE. Differences were considered statistically significant at  $p < 0.05$ . Shown is one of three replicate trials with similar outcomes.

### **Oil Red O staining**

Oil Red O staining was performed as previously reported [42]. In short, worms were collected from NGM plates, washed with 1X PBS buffer and re-suspended in 60  $\mu$ l of 1 $\times$  phosphate-buffered saline (PBS; pH 7.4), 120  $\mu$ l of 2 $\times$  MRWB buffer (160 mM KCl, 40 mM NaCl, 14 mM Na<sub>2</sub>-EGTA, 1 mM spermidine-HCl, 0.4 mM spermine, 30 mM Na-PIPES [Na-piperazine-*N*, *N'*-bis (2-ethanesulfonic acid); pH 7.4], 0.2%  $\beta$ -mercaptoethanol), and 60  $\mu$ l of 4% paraformaldehyde. The worms were then freeze-thawed 3 times and washed twice with 1X PBS. They were then incubated at room temperature in 60% isopropyl alcohol for 10 minutes for dehydration and stained with freshly prepared Oil Red O solution for at least 48 hours on a shaker. For direct and consistent comparison, all Oil Red O images from the same experiment were acquired under identical settings and exposure times. Animals were mounted and imaged with a Q-imaging software and Micropublisher 3.3 RTV color camera outfitted with DIC optics on a Nikon 80i microscope. NIH ImageJ software was used to quantify Oil Red O intensities [42]. 15 to 30 worms were randomly selected from each category in at least two separate batches.

### **Brood Assay**

Worms were bleach synchronized and allowed to grow to L4 stage for determining the progression of egg-laying and the brood size. Individual worm was picked onto a separate NGM plate with OP50 bacteria and allowed to grow for several days. Worms were repeatedly transferred to a freshly seeded NGM plate and progeny was counted every 24 hours. Data from escaping or dying mothers were omitted from the analyses [32].

### **Oleic acid supplementation assay**

To make OA supplemented NGM agar plates, a 0.1 M water based stock solution of OA sodium salts (NuCheck Prep, USA) was prepared and stored at  $-20^{\circ}\text{C}$  in the dark. The OA solution was added continuously to the NGM and promptly poured into the plates. The plates covered with aluminum foil and kept at temperature overnight to dry. The *E. coli* OP50 strain was seeded to each plate and allowed to further dry for one to two days in the dark. Aging assays and Oil Red O staining was performed as described above [43].

### **Lipase assay**

Lipase activity was estimated using commercially available QuantiChrom™ Lipase Assay Kit (BioAssay Systems, USA, Catalog number DLPS-100) and processed according to the manufacturer's instructions. 1 unit of Lipase catalyzes the cleavage of 1  $\mu\text{mol}$  substrate per minute. Three independent samples of one-day-adult worms were prepared by homogenizing in a 20% glycerol, 0.1 M KCl, 20 mM HEPES (pH 7.6) buffer for further measurements as described earlier [44].

### **L1 survival assay**

Worms were bleach synchronized and kept in 1.5 ml centrifuge tube. Worms were seeded onto NGM plates approximately 24 hours afterwards regularly for 12 days, and numbers of seeded worms counted. Worms were grown to young adult stage before survivors were counted. The L1 diapause data were statistically compared using an analysis of covariance (ANCOVA) model.

### **RNA-Seq and data analysis**

*pry-1* targets were examined in synchronized L1 stage animals. At this stage Wnt ligands, receptors, and targets are highly expressed as revealed by microarray studies from SPELL database [45, 46] (Fig. S1C-E). Also, our qRT-PCR experiments showed significant upregulation of three of the Wnt targets, *lin-39*, *egl-5* and *mab-5*, in *pry-1* animals at L1 stage (Fig. S1F). The *pry-1* transcriptome profile can be found in the GEO archive with accession number [GSE94412](https://www.ncbi.nlm.nih.gov/geo/query/acc.cgi?acc=GSE94412). For RNA-Seq experiments synchronized L1 stage animals were obtained by two successive bleach treatments and RNA was isolated using Trizol-reagent (Sigma, USA, Catalog Number T9424) [47]. The quality of total purified RNA was confirmed using bioanalyzer (Agilent 2100 and Nanodrop 1000). cDNA libraries were constructed from 100 - 200ng mRNA using an Illumina-specific commercial kit (TruSeq RNA Sample Preparation Kit v2, Set A Catalog number: RS-122-2001). RNA sequencing was carried out using Illumina Hi-Seq 2000 system at the McGill University Genome Quebec sequencing facility. For each of the N2 and *pry-1(mu38)* strains two biological replicates were used. For each cDNA library, 100 bp paired-end reads were obtained. In total, 30 to 38 million reads were obtained for each sample analyzed for differential gene expression.

The adapters were trimmed using cutadapt/trimgalore, reads with QC values (Phred score) lower than 30 bases were discarded after trimming process [48]. Later, processed sequencing reads were mapped to the reference genome (ce6) (UCSC 2013) using the software package Bowtie 1.0.0 [49]. 92-95% of total sequenced fragments could be mapped to the genome (Table S2). Transcript-level abundance estimation was performed using eXpress 1.5 software package [50]. Among all genes analyzed, 18867 were mapped to known transcripts by at least one sequencing fragment in *C. elegans*. To avoid biases between samples, the gene counts were quantile normalized [48, 51]. Using a negative binomial distribution model of DESeq package in R, differentially-expressed genes were called at a false discovery rate (FDR) of 0.05% [52].

GO analysis was carried out with default setting using GoAmigo (<http://amigo.geneontology.org>). A GO-term containing at least three genes with a *p*-value adjusted for multiple comparisons and < 0.05 (Benjamini-Hochberg method) was counted significant [53]. Tissue enrichment analysis was performed using Wormbase online TEA tool that employs a tissue ontology previously developed by WormBase [54].

## **Gas Chromatography Mass Spectrophotometry (GC-MS)**

Fatty Acid analysis protocol was modified from a previously published method [13, 33]. Eppendorf tubes, glass vials or any containers used for the extraction process were sonicated in dichloromethane (Catalog number 3601-2-40, Caledon Laboratories Ltd., Canada) for 30 minutes to eliminate lipid contamination. To determine FA composition, few thousand adult worms were collected from three 6-cm plates and washed with sterile water to remove any bacterial contamination. Then the worms were transferred into a screw-capped centrifuge tube and spun at 2,500 RPM for 45 seconds, as much water as possible was removed with a Pasteur pipette and transferred to a Standard Opening (8 mm) glass screw top vials (Agilent, part number 5182-0714) and accurately weigh 50-100 mg of sample. 1 ml of 2.5% H<sub>2</sub>SO<sub>4</sub> (Catalog number 8825-1-05, Caledon Laboratories Ltd., Canada) in methanol (Catalog number 6701-7-40, Caledon Laboratories Ltd., Canada) was added to extract fatty acids from tissues and transmethylate them. Samples were spiked with 10 µl of a recovery standard (stearic acid 120 ng/µl, Catalog number S4751-1G Sigma-Aldrich Canada) and incubated at 80°C in a water bath for an hour. To this, a mixture of 0.2 ml of hexane (Catalog number 3201-7-40, Caledon Laboratories Ltd., Canada) and 1.5 ml of H<sub>2</sub>O was added and slowly spun to extract fatty acid methyl esters into the hexane layer. Agilent 6890 series gas chromatographer equipped with a 30 × 0.25 mm SP-2380 fused silica capillary column (Supelco USA), helium as the carrier gas at 1.4 ml/minute, and a flame ionization detector was used for FA analysis. Automatic injections of 1 µl samples in the organic phase were made, without splitting, into the GC inlet set to 250 °C. The thermal program began at 50 °C for 2 minutes, then increased linearly to 300° C at a ramping rate of 8 °C/minute and held this temperature for 15 minutes. A constant flow rate of 1 ml/minute helium carrier gas under electronic pressure control was maintained for the fatty acid composition determination by TIC method using standard software. For quantitation of fatty acids, the peaks across all GC-MS runs were aligned using both chromatographic information (retention times) and mass-spectral data (m/z components) to establish the chemical identity of peaks being compared. A relative FA amounts were calculated by dividing each peak area by the sum of areas for all FA peaks appearing on the same chromatogram. For each FA, the quantities determined by GC-MS were successively normalized in two ways: (1) to an internal standard naphthalene-d<sub>8</sub>, 10 ng/µl (1ng/µl in injection

sample) added to each sample prior to sonication and lipid extraction), and (2) to the weight of the samples.

### **Statistical Analysis**

Statistic tests for lifespan and stress resistance assays were performed using SigmaPlot software 11. The survival curves were estimated using the Kaplan-Meier test and differences among groups were assessed using the log-rank test. Survival data are expressed relative to the control group. Other statistics were performed using Microsoft Office Excel 2016. If not specifically mentioned, p values for the fertility, motility, fat content, fluorescence intensity, L1 survival and enzyme activity assays were calculated by Student's t test after testing for equal distribution of the data and equal variances within the data set. Experiments were performed in triplicate except where stated otherwise. Differences were considered statistically significant at  $p < 0.05$ , thereby indicating a probability of error lower than 5%. Hypergeometric probability tests and statistical significance of the overlap between two gene sets were done using an online program ([http://nemates.org/MA/progs/overlap\\_stats.html](http://nemates.org/MA/progs/overlap_stats.html)).

### **ACKNOWLEDGMENTS**

We are grateful to Brian Golding for providing server space, Paul Sternberg lab for help with RNA-Seq computational analysis, Hendrik Korswagen for *pry-1p::PRY-1::GFP* plasmid, and Don Moerman lab for *pry-1* CRISPR alleles. Some of the strains were obtained from CGC, which is funded by the NIH Office of Research Infrastructure Programs (P40OD010440). We thank Lesley Macneil and anonymous reviewers for comments on previous versions of the manuscript, Jessica Knox for assistance with initial qRT-PCR experiments, and Gupta lab members for helpful discussions. This work was supported by NSERC Discovery grant to BG.

### **AUTHOR CONTRIBUTION**

BG conceived and supervised the entire project. AR, AM and BG designed experiments and wrote the manuscript. AR and AM performed experiments. The authors declare no conflict of interest.

## BIBLIOGRAPHY

1. Zeng, L., et al., *The mouse Fused locus encodes Axin, an inhibitor of the Wnt signaling pathway that regulates embryonic axis formation*. Cell, 1997. **90**(1): p. 181-92.
2. Logan, C.Y. and R. Nusse, *The Wnt signaling pathway in development and disease*. Annu Rev Cell Dev Biol, 2004. **20**: p. 781-810.
3. Korswagen, H.C., *Canonical and non-canonical Wnt signaling pathways in Caenorhabditis elegans: variations on a common signaling theme*. Bioessays, 2002. **24**(9): p. 801-10.
4. Clevers, H. and R. Nusse, *Wnt/beta-catenin signaling and disease*. Cell, 2012. **149**(6): p. 1192-205.
5. Clevers, H., *Wnt/beta-catenin signaling in development and disease*. Cell, 2006. **127**(3): p. 469-80.
6. Hart, M.J., et al., *Downregulation of beta-catenin by human Axin and its association with the APC tumor suppressor, beta-catenin and GSK3 beta*. Curr Biol, 1998. **8**(10): p. 573-81.
7. Korswagen, H.C., et al., *The Axin-like protein PRY-1 is a negative regulator of a canonical Wnt pathway in C. elegans*. Genes Dev, 2002. **16**(10): p. 1291-302.
8. Gleason, J.E., H.C. Korswagen, and D.M. Eisenmann, *Activation of Wnt signaling bypasses the requirement for RTK/Ras signaling during C. elegans vulval induction*. Genes Dev, 2002. **16**(10): p. 1281-90.
9. Maloof, J.N., et al., *A Wnt signaling pathway controls hox gene expression and neuroblast migration in C. elegans*. Development, 1999. **126**(1): p. 37-49.
10. Smolenaars, M.M., et al., *Molecular diversity and evolution of the large lipid transfer protein superfamily*. J Lipid Res, 2007. **48**(3): p. 489-502.

11. Murphy, C.T., et al., *Genes that act downstream of DAF-16 to influence the lifespan of Caenorhabditis elegans*. Nature, 2003. **424**(6946): p. 277-83.
12. Seah, N.E., et al., *Autophagy-mediated longevity is modulated by lipoprotein biogenesis*. Autophagy, 2016. **12**(2): p. 261-72.
13. Watts, J.L. and J. Browse, *Genetic dissection of polyunsaturated fatty acid synthesis in Caenorhabditis elegans*. Proc Natl Acad Sci U S A, 2002. **99**(9): p. 5854-9.
14. Brock, T.J., J. Browse, and J.L. Watts, *Genetic regulation of unsaturated fatty acid composition in C. elegans*. PLoS Genet, 2006. **2**(7): p. e108.
15. Goudeau, J., et al., *Fatty acid desaturation links germ cell loss to longevity through NHR-80/HNF4 in C. elegans*. PLoS Biol, 2011. **9**(3): p. e1000599.
16. Ewald, C.Y., et al., *Dauer-independent insulin/IGF-1-signalling implicates collagen remodelling in longevity*. Nature, 2015. **519**(7541): p. 97-101.
17. Zugasti, O., J. Rajan, and P.E. Kuwabara, *The function and expansion of the Patched- and Hedgehog-related homologs in C. elegans*. Genome Res, 2005. **15**(10): p. 1402-10.
18. Jackson, B.M., et al., *Use of an activated beta-catenin to identify Wnt pathway target genes in caenorhabditis elegans, including a subset of collagen genes expressed in late larval development*. G3 (Bethesda), 2014. **4**(4): p. 733-47.
19. Lustig, B., et al., *Negative feedback loop of Wnt signaling through upregulation of conductin/axin2 in colorectal and liver tumors*. Mol Cell Biol, 2002. **22**(4): p. 1184-93.
20. Gorrepati, L., et al., *Identification of Wnt Pathway Target Genes Regulating the Division and Differentiation of Larval Seam Cells and Vulval Precursor Cells in Caenorhabditis elegans*. G3 (Bethesda), 2015. **5**(8): p. 1551-66.
21. van der Bent, M.L., et al., *Loss-of-function of beta-catenin bar-1 slows development and activates the Wnt pathway in Caenorhabditis elegans*. Sci Rep, 2014. **4**: p. 4926.



22. Gorrepati, L. and D.M. Eisenmann, *The C. elegans embryonic fate specification factor EGL-18 (GATA) is reutilized downstream of Wnt signaling to maintain a population of larval progenitor cells*. Worm, 2015. **4**(1): p. e996419.
23. Essers, M.A., et al., *Functional interaction between beta-catenin and FOXO in oxidative stress signaling*. Science, 2005. **308**(5725): p. 1181-4.
24. Kumar, N., et al., *Genome-wide endogenous DAF-16/FOXO recruitment dynamics during lowered insulin signalling in C. elegans*. Oncotarget, 2015. **6**(39): p. 41418-33.
25. Hou, N.S. and S. Taubert, *Function and Regulation of Lipid Biology in Caenorhabditis elegans Aging*. Front Physiol, 2012. **3**: p. 143.
26. Lemieux, G.A. and K. Ashrafi, *Investigating Connections between Metabolism, Longevity, and Behavior in Caenorhabditis elegans*. Trends Endocrinol Metab, 2016. **27**(8): p. 586-96.
27. Lynn, D.A., et al., *Omega-3 and -6 fatty acids allocate somatic and germline lipids to ensure fitness during nutrient and oxidative stress in Caenorhabditis elegans*. Proc Natl Acad Sci U S A, 2015. **112**(50): p. 15378-83.
28. Steinbaugh, M.J., et al., *Lipid-mediated regulation of SKN-1/Nrf in response to germ cell absence*. Elife, 2015. **4**: p. e07836.
29. Brock, T.J., J. Browse, and J.L. Watts, *Fatty acid desaturation and the regulation of adiposity in Caenorhabditis elegans*. Genetics, 2007. **176**(2): p. 865-75.
30. Chen, S., et al., *The conserved NAD(H)-dependent corepressor CTBP-1 regulates Caenorhabditis elegans life span*. Proc Natl Acad Sci U S A, 2009. **106**(5): p. 1496-501.
31. Grant, B. and D. Hirsh, *Receptor-mediated endocytosis in the Caenorhabditis elegans oocyte*. Mol Biol Cell, 1999. **10**(12): p. 4311-26.
32. Van Rompay, L., et al., *New genetic regulators question relevance of abundant yolk protein production in C. elegans*. Sci Rep, 2015. **5**: p. 16381.

33. Van Gilst, M.R., et al., *Nuclear hormone receptor NHR-49 controls fat consumption and fatty acid composition in C. elegans*. PLoS Biol, 2005. **3**(2): p. e53.
34. Yang, F., et al., *An ARC/Mediator subunit required for SREBP control of cholesterol and lipid homeostasis*. Nature, 2006. **442**(7103): p. 700-4.
35. Han, S., et al., *Mono-unsaturated fatty acids link H3K4me3 modifiers to C. elegans lifespan*. Nature, 2017. **544**(7649): p. 185-190.
36. Xu, M., H.J. Joo, and Y.K. Paik, *Novel functions of lipid-binding protein 5 in Caenorhabditis elegans fat metabolism*. J Biol Chem, 2011. **286**(32): p. 28111-8.
37. Heestand, B.N., et al., *Dietary restriction induced longevity is mediated by nuclear receptor NHR-62 in Caenorhabditis elegans*. PLoS Genet, 2013. **9**(7): p. e1003651.
38. Garg, A. and A.K. Agarwal, *Lipodystrophies: disorders of adipose tissue biology*. Biochim Biophys Acta, 2009. **1791**(6): p. 507-13.
39. Yang, H., et al., *Axin expression in thymic stromal cells contributes to an age-related increase in thymic adiposity and is associated with reduced thymopoiesis independently of ghrelin signaling*. J Leukoc Biol, 2009. **85**(6): p. 928-38.
40. Brenner, S., *The genetics of Caenorhabditis elegans*. Genetics, 1974. **77**: p. 71-94.
41. Ranawade, A.V., P. Cumbo, and B.P. Gupta, *Caenorhabditis elegans histone deacetylase hda-1 is required for morphogenesis of the vulva and LIN-12/Notch-mediated specification of uterine cell fates*. G3 (Bethesda), 2013. **3**(8): p. 1363-74.
42. Soukas, A.A., et al., *Rictor/TORC2 regulates fat metabolism, feeding, growth, and life span in Caenorhabditis elegans*. Genes Dev, 2009. **23**(4): p. 496-511.
43. Watts, J.L., et al., *Deficiencies in C20 polyunsaturated fatty acids cause behavioral and developmental defects in Caenorhabditis elegans fat-3 mutants*. Genetics, 2003. **163**(2): p. 581-9.

44. Narbonne, P. and R. Roy, *Caenorhabditis elegans* dauers need LKB1/AMPK to ration lipid reserves and ensure long-term survival. *Nature*, 2009. **457**(7226): p. 210-4.
45. Hillier, L.W., et al., *Massively parallel sequencing of the polyadenylated transcriptome of C. elegans*. *Genome Res*, 2009. **19**(4): p. 657-66.
46. Yook, K., et al., *WormBase 2012: more genomes, more data, new website*. *Nucleic Acids Res*, 2012. **40**(Database issue): p. D735-41.
47. Chomczynski, P. and N. Sacchi, *Single-step method of RNA isolation by acid guanidinium thiocyanate-phenol-chloroform extraction*. *Anal Biochem*, 1987. **162**(1): p. 156-9.
48. Martin, M., *Cutadapt Removes Adapter Sequences From High-Throughput Sequencing Reads*. *EMBnet.journal*, 2011. **17**(1).
49. Langmead, B., et al., *Ultrafast and memory-efficient alignment of short DNA sequences to the human genome*. *Genome Biol*, 2009. **10**(3): p. R25.
50. Roberts, A. and L. Pachter, *Streaming fragment assignment for real-time analysis of sequencing experiments*. *Nat Methods*, 2013. **10**(1): p. 71-3.
51. Bullard, J.H., et al., *Evaluation of statistical methods for normalization and differential expression in mRNA-Seq experiments*. *BMC Bioinformatics*, 2010. **11**: p. 94.
52. Anders, S. and W. Huber, *Differential expression analysis for sequence count data*. *Genome Biol*, 2010. **11**(10): p. R106.
53. Carbon, S., et al., *AmiGO: online access to ontology and annotation data*. *Bioinformatics*, 2009. **25**(2): p. 288-9.
54. Angeles-Albores, D., et al., *Tissue enrichment analysis for C. elegans genomics*. *BMC Bioinformatics*, 2016. **17**(1): p. 366.

## TABLES

**Table 1.** Lifespan of animals.

| Genotype                               | Mean lifespan (days)      | Max lifespan (days) | Events scored | Control            | Mean lifespan (days) | Max lifespan (days) | Events scored |
|----------------------------------------|---------------------------|---------------------|---------------|--------------------|----------------------|---------------------|---------------|
| <i>pry-1(mu38)</i>                     | 3.2 ± 0.1 <sup>\$</sup>   | 7                   | 92            | N2                 | 16.8 ± 0.24          | 19                  | 101           |
| <i>pry-1(gk3682)</i>                   | 3.7 ± 0.1 <sup>\$</sup>   | 4                   | 60            | N2                 | 16.9 ± 0.4           | 19                  | 121           |
| <i>pry-1</i> (RNAi) #1                 | 13.2 ± 0.85 <sup>*</sup>  | 18                  | 72            | GFP                | 16.1 ± 0.61          | 20                  | 99            |
| <i>pry-1</i> (RNAi) #2                 | 11.63 ± 0.92 <sup>#</sup> | 15                  | 73            | EV                 | 16.4 ± 0.64          | 21                  | 66            |
| <i>pry-1</i> (RNAi) #1 adult-specific  | 12.9 ± 0.72 <sup>*</sup>  | 18                  | 103           | EV                 | 16.6 ± 0.9           | 22                  | 116           |
| <i>pry-1</i> (RNAi) #2 adult-specific  | 11.44 ± 0.72 <sup>#</sup> | 16                  | 94            | EV                 | 16.6 ± 0.9           | 22                  | 116           |
| <i>pry-1(mu38)</i> 1mM OA supplemented | 5.3 ± 0.3 <sup>#</sup>    | 8                   | 65            | <i>pry-1(mu38)</i> | 4.0 ± 0.2            | 7                   | 52            |

*pry-1* RNAi KD was done using two different plasmids (marked as #1 and #2). While #1 was from Ahringer's lab, #2 was constructed as part of this study (see Methods). The mean lifespan and standard error of each strain is shown. Two to three independent batches were performed with each batch containing more than 30 starting animals. GFP and EV are controls. EV: empty vector (L4440).  $p < 0.05$  (\*),  $p < 0.001$  (#), and  $p < 0.0001$  (\$).

## FIGURE LEGENDS

**Figure 1.** *pry-1(mu38)* transcriptome analysis.

**(A)** Scatter plots of differentially expressed genes in *pry-1(mu38)*. Red dots mark significantly altered transcripts with a FDR  $p$ -adj of  $< 0.05$ , whereas black dots mark transcripts that are not significantly altered (FDR  $p$ -values of  $> 0.05$ ). **(B)** Selected GO categories enriched in *pry-1(mu38)* targets are identified by GO Amigo, ( $p$ -adj  $< 0.05$ ). (see Table S4 for a detailed list). **(C)** Venn diagrams showing the overlap between *pry-1*, *bar-1* and *daf-16* transcriptional targets. The representation factor (RF), hyp.geo  $p$ -values and dataset used in each analysis are indicated.

**Figure 2.** Lifespan analyses in *pry-1* mutant and after *pry-1* RNAi KD.

**A- D)** Survival curves. X-axis contains days of adulthood. **A)** *pry-1(mu38)* animals show decreased lifespan compared with N2. **B)** Survival curves following egg stage and adulthood RNAi treatments. RNAi KDs reduces lifespans.

**Figure 3.** Lipid levels and distribution are altered in *pry-1(mu38)* mutants.

Arrowheads indicate intestine and dotted areas gonad. **A)** Representative DIC images of N2 and *pry-1(mu38)*, stained with Oil Red O. D: dorsal; V: ventral; A: anterior; and P: posterior. **B, C)** Quantification of Oil Red O staining. Data are presented as mean; error bars in this and subsequent graphs represent SEM. **C)** Ratio of gonadal to intestine (G/I) lipid. **D)** The lipase activity is decreased in *pry-1(mu38)*. The lipase activity is plotted as activity per mg of protein. **E)** The average number of eggs laid by wild-type and *pry-1(mu38)* animals on different days over the duration of their reproductive period. **F)** *pry-1(mu38)* displayed significant reduction in L1 survival following starvation. Percent survival of L1 larvae in the absence of food has been plotted. Graph represents the average of three independent experiments. **G)** Representative images of N2 and *pry-1(mu38)* following RNAi treatments and Oil Red-O staining. **H)** The histogram shows Oil Red intensity of N2 and *pry-1(mu38)*. Scale bar, 50  $\mu$ m,  $*p < 0.001$  (unpaired t-test).

**Figure 4:** Expression of *vit* genes in *pry-1(mu38)*.

**A)** qRT-PCR of *vit* genes at larval and adult stages in *pry-1(mu38)* mutants. Relative normalized expression has been plotted. Error bars represent standard error of the mean (\* $p < 0.05$  and \*\* $p < 0.01$  for all mutants compared to wild type).

**Figure 5:** Vitellogenin mediated lipid metabolism in *pry-1* mutants.

**A)** DIC micrographs of representative N2 and *pry-1(mu38)* adults stained with Oil Red-O treated with *vit* RNAi. **B)** The corresponding Oil Red O quantifications following each treatment. **C)** Representative images of N2 and *pry-1(mu38)* following *rme-2* RNAi KD. **D)** The histogram shows Oil red intensity of N2 and *pry-1(mu38)*. Scale bar, 20  $\mu\text{m}$ .

**Figure 6.** GC-MS analysis of fatty acids in *pry-1* mutants and rescue of lifespan and lipid defects following Oleic acid treatments.

**A)** Total FA levels of selected fatty acid species expressed in  $\log_{10}$  value as determined by GC-MS analysis. The *pry-1* mutants have low levels of FA. Error bars represent the standard deviation. Significant differences between wild type and *pry-1* mutant are marked with stars, \*  $p < 0.03$ , \*\*  $p < 0.015$ . **B)** Lipid staining of N2 and *pry-1(mu38)* adults supplemented with 1 mM OA. **C)** Quantification of total lipid,  $p < 0.001$ . **D)** Survival curves of OA-fed *pry-1(mu38)* animals. Mean adult lifespan ( $\pm$  SEM) of each strain is: 0 mM OA  $4.010 \pm 0.163$  days, 1 mM OA  $5.291 \pm 0.226$ , ( $p < 0.001$ ).

## FIGURES

**Figure 1.** *pry-1(mu38)* transcriptome analysis.

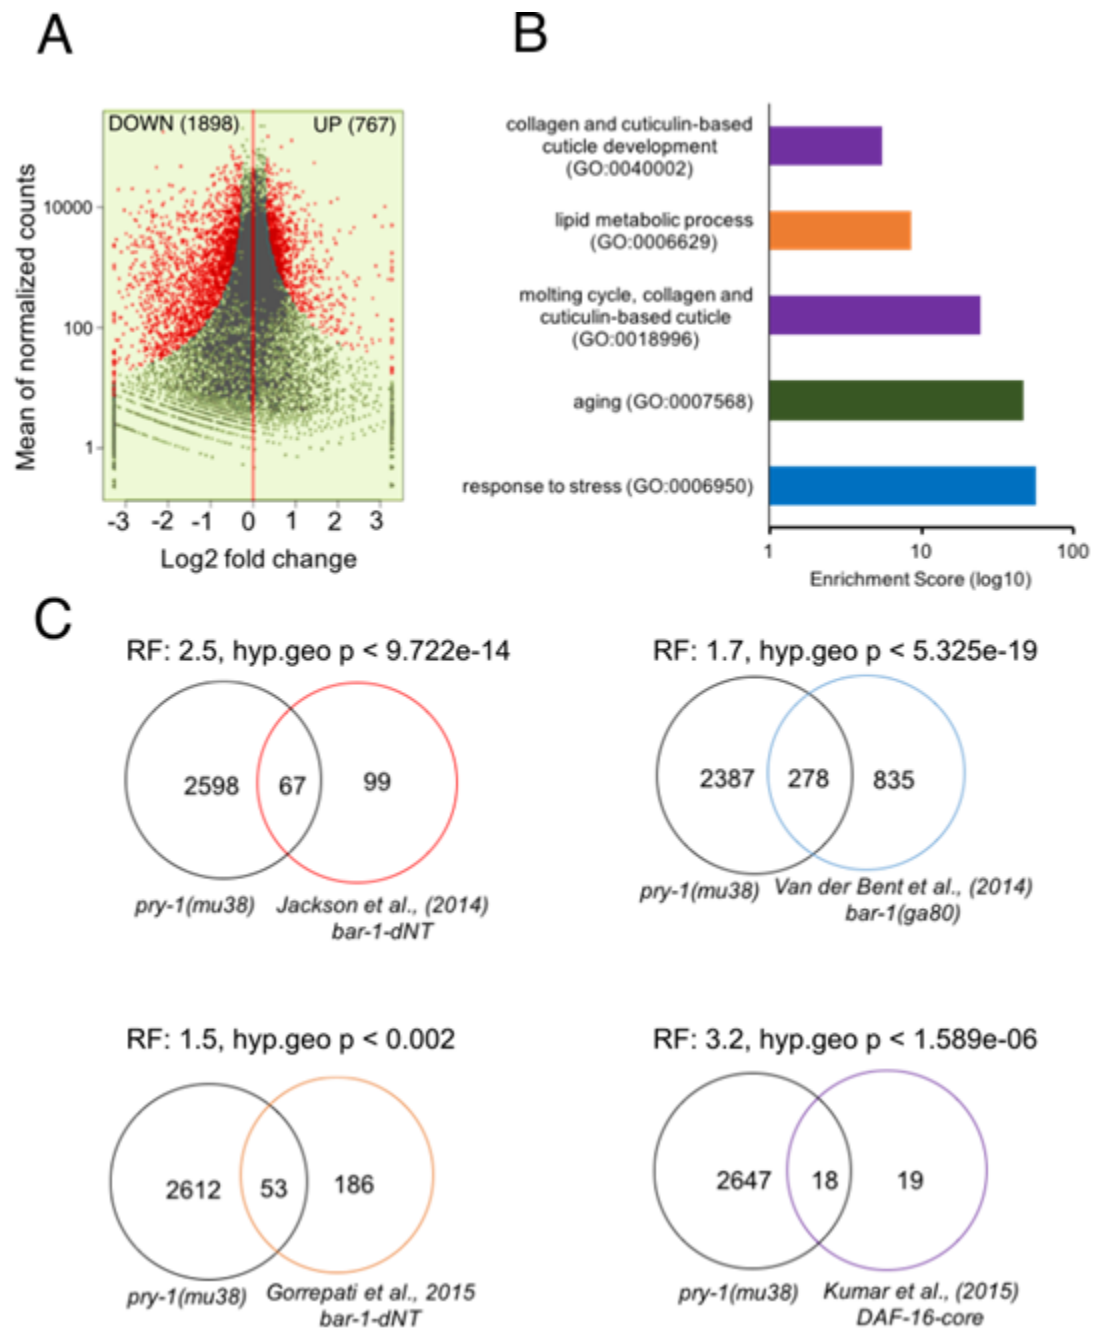

**Figure 2.** Lifespan analyses in *pry-1* mutant and after *pry-1* RNAi KD.

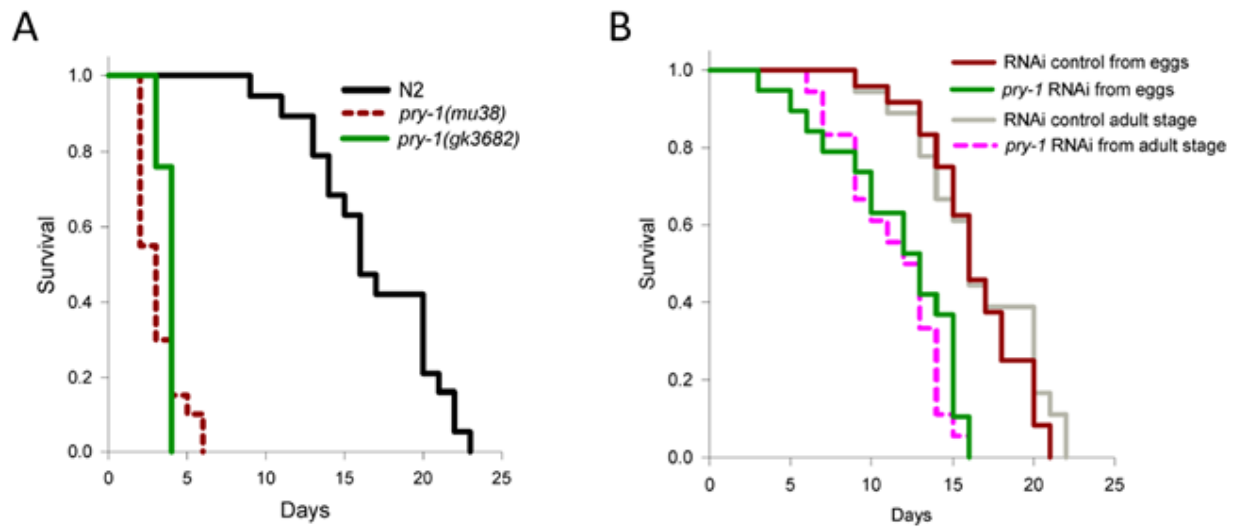



**Figure 3.** Lipid levels and distribution is altered in *pry-1(mu38)* mutants.

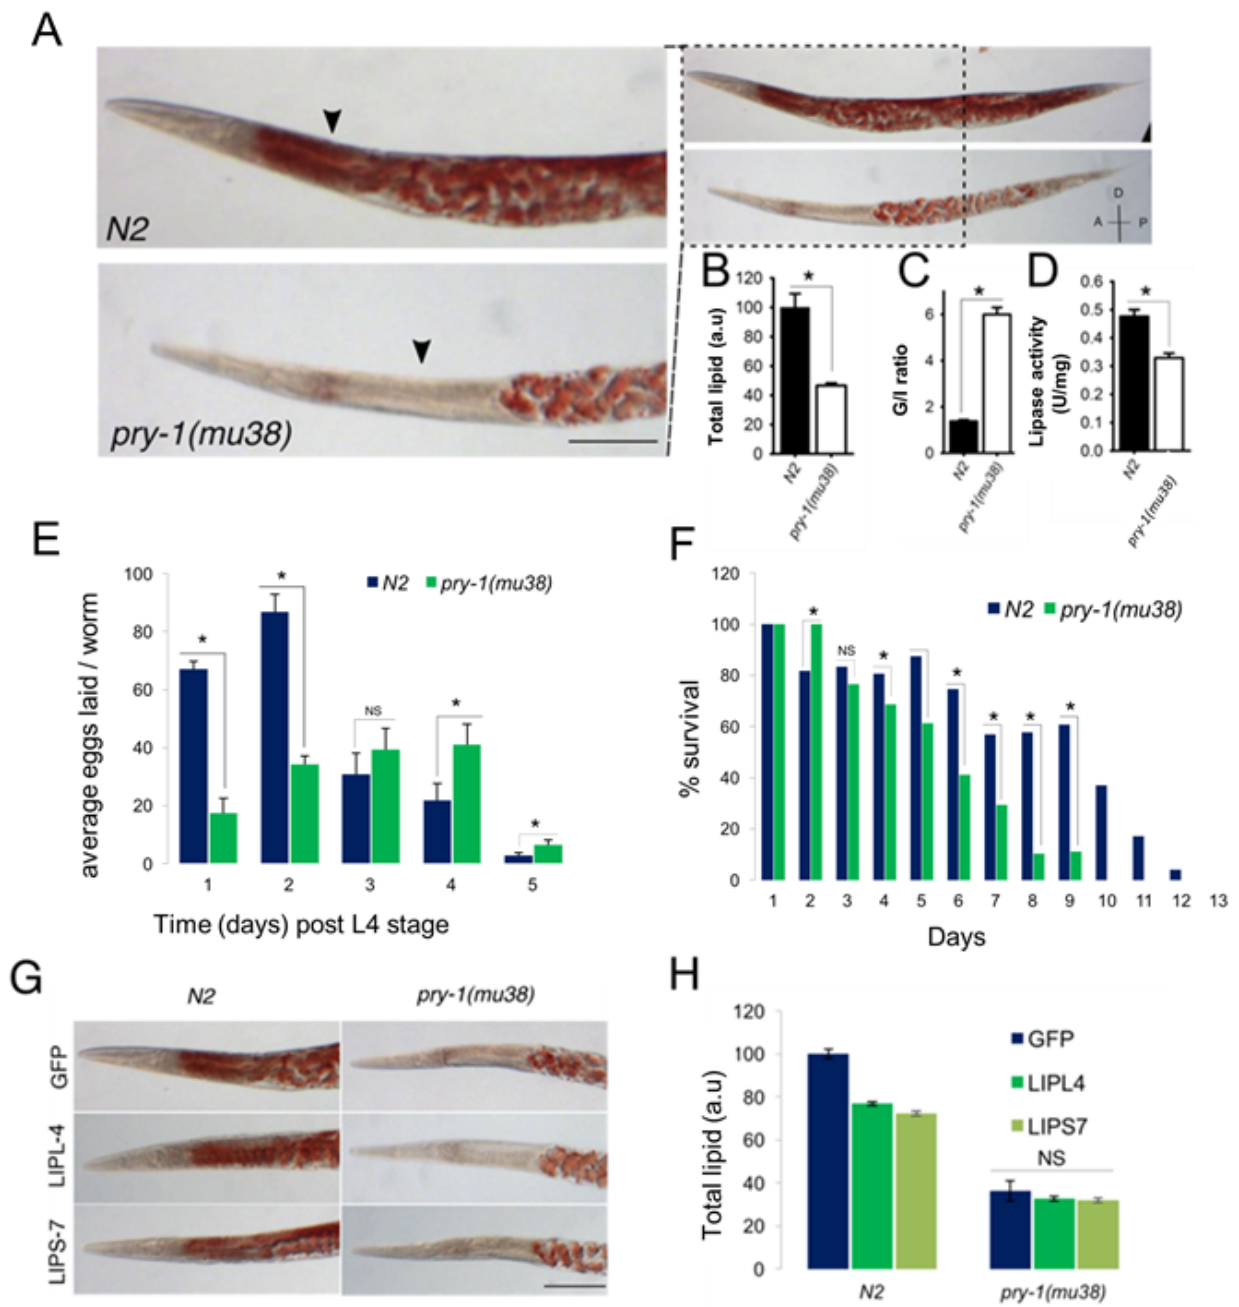

**Figure 4:** Expression of *vit* genes is altered in *pry-1(mu38)*.

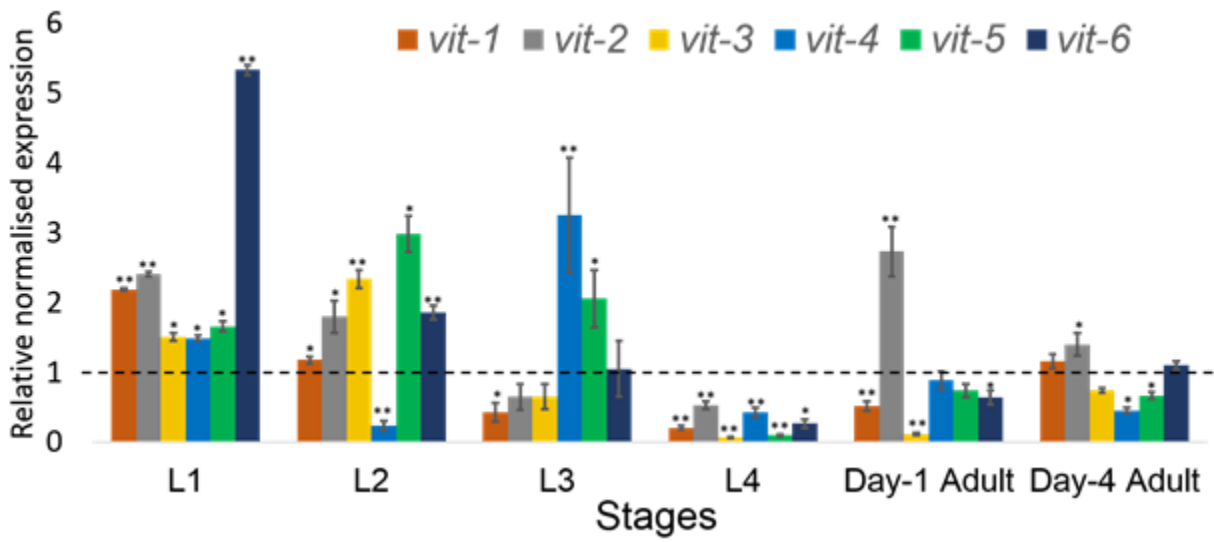

**Figure 5:** Vitellogenin regulation of lipid content in *pry-1(mu38)*.

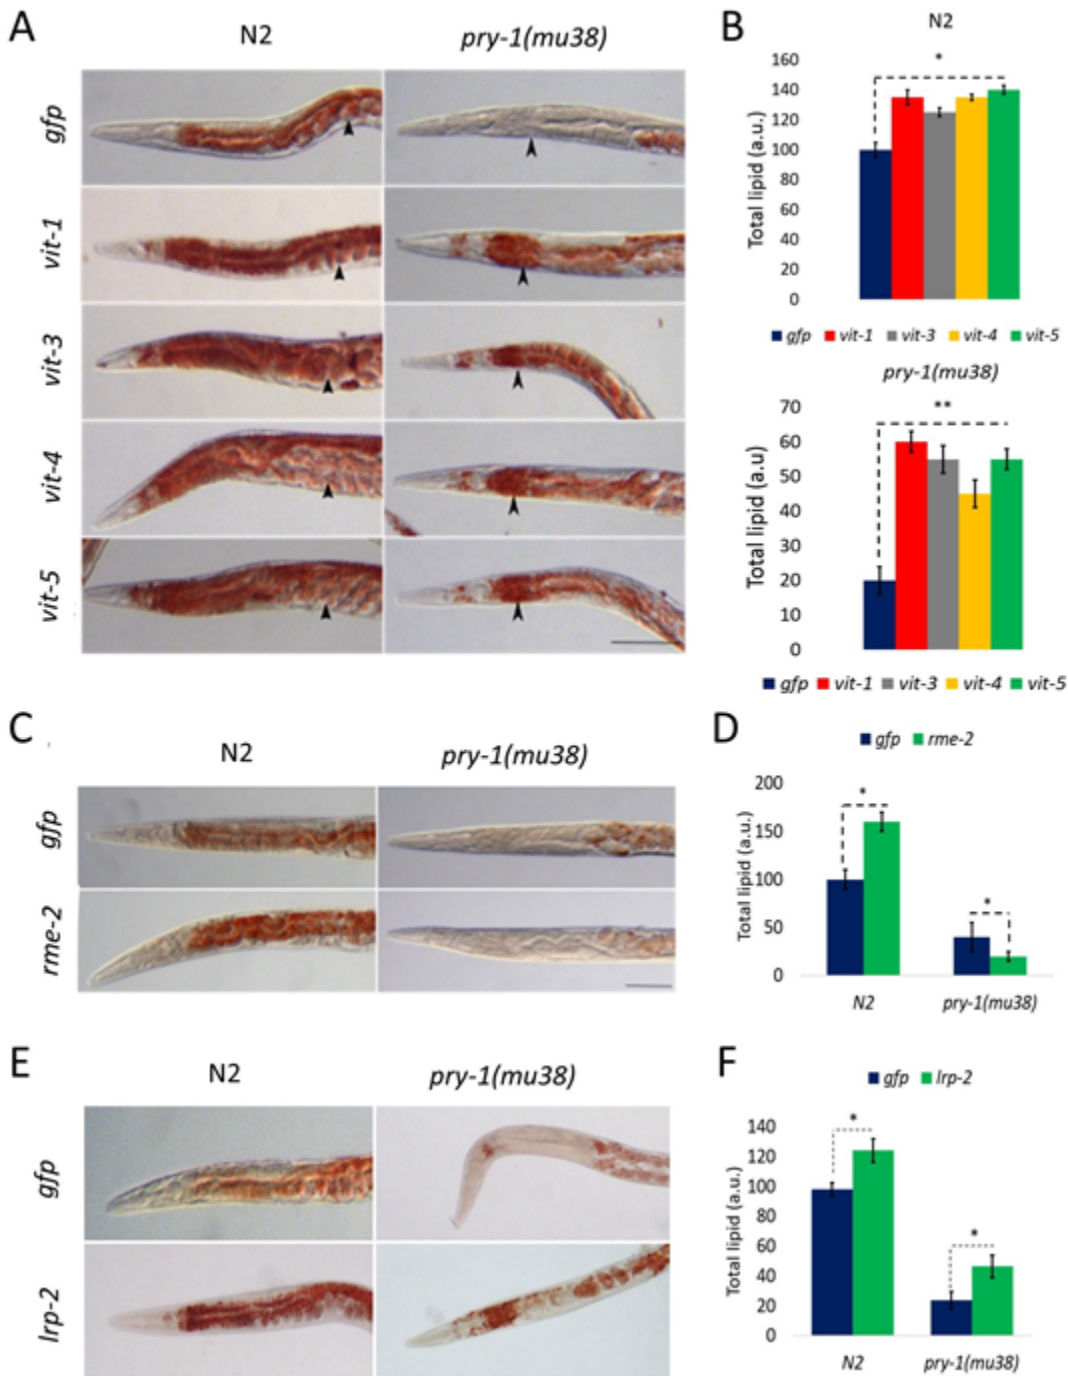

**Figure 6.** GC-MS analysis of fatty acids in *pry-1* mutants and partial rescue of lifespan and lipid defects following Oleic acid treatments.

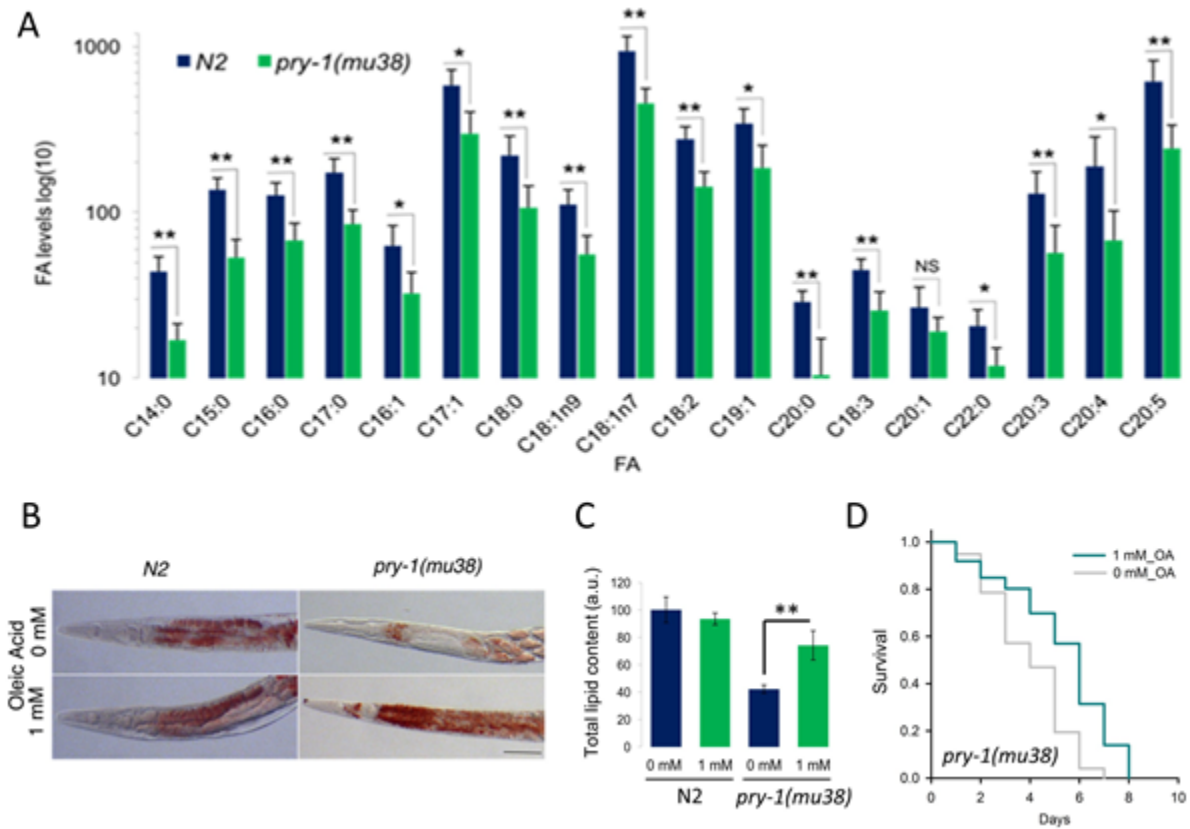

## SUPPLEMENTAY DATA

### SUPPLEMENTARY FIGURE LEGENDS

**Figure S1.** Expression profile of Wnt ligands, receptors, and target genes.

**A)** qPCR analysis of mRNA for PRY-1 target genes in the *pry-1(mu38)* mutant. Data represent mean  $\pm$  SEM of 3 biological repeats.  $*p < 0.001$ . **B)** Expression of fat metabolism-related genes in *pry-1* mutant. Error bars represent standard error.  $*p < 0.05$ ,  $**p < 0.01$ . **C-E)** Developmental expression patterns of known Wnt ligands, receptors and target genes from published microarray sources (see Methods). **F)** qPCR validations of selected Wnt target genes during the L1 and L4 stages.

**Figure S2.** Overview of lipid metabolism and genes with altered expression in *pry-1(mu38)*.

The lipid anabolic and catabolic pathway is based on published studies. Lipid anabolic processes involve initiation, desaturation and elongation of fatty-acid (FA), followed by triglyceride (TAG) formation. Initiation involves conversion of Acetyl CoA to the saturated fatty-acid (SFA) Palmitate (C16:0). Elongase (*elo*) and desaturase (*fat*) enzymes act on Palmitate to modify it to long chain mono- and poly-unsaturated fatty acids (MUFAs and PUFAs, respectively). MUFAs and PUFAs are collectively termed as free fatty acids (FFAs). The FFAs are linked with glycerol 3-phosphate (Glycerol 3P) to produce lysophosphatidic acid (LPA) and phosphatidic acid (PA). PA and monoglycerides (MAG) serve as building blocks of diglycerides (DAG) synthesis. DAGs are converted into neutral lipids (TAGs). Lipid catabolism begins with the breakdown of TAGs into DAGs by ATGL-1, and other lipases and lipase-like enzymes (abbreviated as '*lip1*' and '*lips*') to release FFAs. FFAs are further broken down to Acetyl CoA through peroxisomal- and mitochondrial-  $\beta$ -oxidation and release energy. Putative genes with enzymatic activity that are involved in lipid metabolism are shown at the appropriate step. Genes with altered expression in *pry-1(mu38)* are highlighted in blue (DOWN) and red (UP).

**Figure S3.** Lipid levels in *pry-1(mu38)* and *vit* mutants.

**A)** Quantification of Oil Red O staining intensity in *pry-1(mu38)* and wild-type animals at different developmental stages. Lipids are lower in *pry-1* mutants at all stages except L2. **B)**

Quantitation data of Oil Red O staining in N2 and *vit* mutants during the young adult stage. Lipid levels are higher in *vit-1(ok2616)*, *vit-2(ok3211)*, *vit-4(ok2982)*, and *vit-5(ok3239)* animals. Error bars represent mean  $\pm$  SEM. \* $p < 0.01$ , \*\* $p < 0.001$ .

**Figure S4.** *vit-1* RNAi Knocks down *vit-2* transcript level.

**A)** qPCR analysis of *vit-2* in the *pry-1(mu38)* day 3 mutants after adult specific *vit-1* RNAi KD. Data represent mean  $\pm$  SEM of 3 biological repeats. \* $p < 0.01$ .

**Figure S5.** Relative fatty acid abundance in *pry-1(mu38)*.

**A)** Relative abundance of selected fatty acid species expressed in percentage of total fatty acid as determined by GC-MS analysis. *pry-1* mutants have marginally lower levels of C15:0, C16:0 and higher levels of C20:1, C22:0 than N2 (marked with star,  $p < 0.05$ ). Error bars represent the standard deviation. **B, C)** A representative GC-MS Total Ion Chromatogram (TIC) traces of populations of the N2 and *pry-1(mu38)* worms, respectively. The peaks corresponding to fatty acid species are identified.

**Figure S6.** Lipid staining and quantification in *bar-1*, *pop-1*, and *dNT-bar-1* animals.

**A)** Representative DIC images of N2 and *dNT-bar-1* at 20 °C, after heat shock at 30 °C for 12hrs and 38 °C for 30 minutes, stained with Oil Red O. **B)** Quantification of total lipids in *dNT-bar-1* animals after heat shock treatments. (2 trials,  $n > 50$  for each trial;  $p < 0.01$  for all mutants compared to wild type).

## SUPPLEMENTARY MOVIES

**Movie S1.** Sinusoidal movement of N2.

**Movie S2.** Roller phenotype of *pry-1(mu38)*.

## SUPPLEMENTARY TABLES

**Table S1.** List primers used in this study.

| Gene          | Primer orientation<br>(Forward, FP;<br>Reverse, RP) | Sequence (5' to 3')                          |
|---------------|-----------------------------------------------------|----------------------------------------------|
| <i>pmp-3</i>  | FP                                                  | <b>GL747</b> CTTAGAGTCAAGGGTCGCAGTGGAG       |
|               | RP                                                  | <b>GL748</b> ACTGTATCGGCACCAAGGAACTGG        |
| <i>pry-1</i>  | FP                                                  | <b>GL741</b> CGCCAACACGAGGAGTTTGTGG          |
|               | RP                                                  | <b>GL742</b> TGTGATGAATGGTGGGCGGAGC          |
| <i>pry-1</i>  | FP                                                  | <b>GL1343</b> ATTACCCGGGCTCCGCCACCATTTCATCAC |
|               | RP                                                  | <b>GL1344</b> TGCTGAGCTCGAGCCTTTCTGTGCTGCCT  |
| <i>ptr-16</i> | FP                                                  | <b>GL853</b> GCAATGCTTCATCCCGATTACATCC       |
|               | RP                                                  | <b>GL854</b> GTGGTTTGACGATCCGTTTCGGA         |
| <i>ptr-19</i> | FP                                                  | <b>GL855</b> CATCAACTACCCATCAATCTGCGTG       |
|               | RP                                                  | <b>GL856</b> GATCCGAGACGAGAAGCAGCTTGA        |
| <i>ptr-20</i> | FP                                                  | <b>GL857</b> CATTGTGCCGACGATTTCTCAGG         |
|               | RP                                                  | <b>GL858</b> GTGTTGACATGAGAGACGAGGGCA        |
| <i>grd-14</i> | FP                                                  | <b>GL876</b> TTTTCGTCGCCATCTCGTCT            |
|               | RP                                                  | <b>GL877</b> GGCATGCCTCTGGCTCATA             |
| <i>grd-15</i> | FP                                                  | <b>GL878</b> GCAACGGGATGAGCAGATAGA           |
|               | RP                                                  | <b>GL879</b> GGGTTGCAACACATGAAGC             |
| <i>grd-6</i>  | FP                                                  | <b>GL880</b> TATTGCCAGCCAAATCCAAGAGTCGT      |
|               | RP                                                  | <b>GL881</b> GTTGTGGTCTGTACTGTTGTTGGA        |
| <i>grl-1</i>  | FP                                                  | <b>GL882</b> ACTGCCACAAGATATCAGGCAT          |
|               | RP                                                  | <b>GL883</b> TTGTAGAGTCGGTTGCTGGG            |
| <i>grl-16</i> | FP                                                  | <b>GL884</b> GCTTTGAAGAACGAGAAGGACAACC       |
|               | RP                                                  | <b>GL885</b> GTTTCTCTTTCCGTACCAGTTGACG       |
| <i>grl-21</i> | FP                                                  | <b>GL886</b> ACGGACCAGGACCATACAGA            |



|               |    |                                        |
|---------------|----|----------------------------------------|
|               | RP | <b>GL887</b> TCACCTGATGTCATTCCCTTCT    |
| <i>grl-4</i>  | FP | <b>GL888</b> GGAGAGGAACATGAACGGTGA     |
|               | RP | <b>GL889</b> CTTGGCAGTAGGTCTCGGTG      |
| <i>grl-6</i>  | FP | <b>GL890</b> GAGACCATCTTGCCCGTGTA      |
|               | RP | <b>GL891</b> GCAACAATCGTTCTGAGCTGG     |
| <i>grl-13</i> | FP | <b>GL892</b> GGAAGAGGCAATGTCGTCCA      |
|               | RP | <b>GL893</b> AAATCTGGCCGTCCA ACTCC     |
| <i>vit-1</i>  | FP | <b>GL872</b> GGTTTCGCTTTGACGGATACAC    |
|               | RP | <b>GL873</b> AACTCGTTGGTGGACTCATC      |
| <i>vit-2</i>  | FP | <b>GL870</b> GACACCGAGCTCATCCGCCCA     |
|               | RP | <b>GL871</b> TTCCTTCTCTCCATTGACCT      |
| <i>vit-3</i>  | FP | <b>GL868</b> GGCTCGTGAGCAA ACTGTTG     |
|               | RP | <b>GL869</b> TTAATAGGCAACGCAGGCGG      |
| <i>vit-4</i>  | FP | <b>GL866</b> TGTC AACGGACAAGAGGTTG     |
|               | RP | <b>GL867</b> TCCTTTGGTCCAGAGACCTTC     |
| <i>vit-5</i>  | FP | <b>GL864</b> GGCAATTTGTTAAGCCACAA      |
|               | RP | <b>GL865</b> CCTCCTTTGGTCCAGAAACCT     |
| <i>fat-4</i>  | FP | <b>GL1201</b> ATGGATGCCACTACCGTATTCC   |
|               | RP | <b>GL1202</b> TCTGGTTCTTGTGTAGGGCAC    |
| <i>fat-5</i>  | FP | <b>GL1203</b> ATGGGTATTCCTCCTGCACAC    |
|               | RP | <b>GL1204</b> TCCATGAGAGGGTGGCTTTG     |
| <i>fat-6</i>  | FP | <b>GL1205</b> GCGCTGCTCACTATTTCCGG     |
|               | RP | <b>GL1206</b> GGAAGTTGTGACCTCCCTCTC    |
| <i>fat-7</i>  | FP | <b>GL1207</b> GCGCTGCTCACTATTTTGGT     |
|               | RP | <b>GL1208</b> TGTGACCTCCTCACCAACG      |
| <i>nhr-49</i> | FP | <b>GL1209</b> ATCACCGACGAGATCATGCC     |
|               | RP | <b>GL1210</b> TCGAAACCCCTTGAAAGCA      |
| <i>nhr-80</i> | FP | <b>GL1211</b> GGTCGAATGGAAATGACACAGA   |
|               | RP | <b>GL1212</b> CATT CAGATCTACCTCGGTTGTG |
| <i>pod-2</i>  | FP | <b>GL1238</b> TCAGCGACGAAAGCCATCC      |
|               | RP | <b>GL1239</b> CGTCGGAAAATGTGATGCTCC    |

|               |    |                                        |
|---------------|----|----------------------------------------|
| <i>fasn-1</i> | FP | <b>GL1236</b> ACTGAAGGAGTTGCAGCCAT     |
|               | RP | <b>GL1237</b> CTCCTTGTGCCCATCAGTGT     |
| <i>mlcd-1</i> | FP | <b>GL1234</b> TCACAAAAAGAGGAGCACCG     |
|               | RP | <b>GL1235</b> ATACCAGAAAGACCAGGCTGTG   |
| <i>mab-5</i>  | FP | <b>GL737</b> AGCATGTATCCTGGATGGACAGGCG |
|               | RP | <b>GL738</b> TGCTGAAGCAGATGTGCCGGATG   |
| <i>egl-5</i>  | FP | <b>GL745</b> ACGGCTGGCCACAGAACTACAAC   |
|               | RP | <b>GL746</b> AGTTGGGCCACGCCGTATTC      |
| <i>lin-39</i> | FP | <b>GL739</b> ACTGCACCGCCTGAATTCTTATCC  |
|               | RP | <b>GL740</b> TGGAAGCACCTGGAAGGAGACG    |

**Table S2.** The number mRNA transcripts mapped to the *C. elegans* genome.

|                           | <i>N2_1</i> | <i>N2_2</i> | <i>pry-1_1</i> | <i>pry-1_2</i> |
|---------------------------|-------------|-------------|----------------|----------------|
| Number of input reads     | 31398474    | 38382323    | 36861495       | 35886365       |
| Average input read length | 194         | 193         | 193            | 193            |

UNIQUE READS

|                           |          |          |          |          |
|---------------------------|----------|----------|----------|----------|
| Number of reads           | 29693460 | 35944075 | 35124604 | 34111824 |
| Uniquely mapped reads %   | 94.57%   | 93.65%   | 95.29%   | 95.06%   |
| Average mapped length     | 192.8    | 192.79   | 192.66   | 192.6    |
| Mismatch rate per base, % | 0.11%    | 0.11%    | 0.11%    | 0.11%    |

READS MAPPED TO MULTIPLE LOCI

|                                        |         |         |         |         |
|----------------------------------------|---------|---------|---------|---------|
| Number of reads                        | 1182683 | 1790500 | 1131080 | 1182083 |
| % of reads                             | 3.77%   | 4.66%   | 3.07%   | 3.29%   |
| Number of reads mapped to several loci | 75341   | 122959  | 79013   | 85400   |
| % of reads mapped to several loci      | 0.24%   | 0.32%   | 0.21%   | 0.24%   |

UNMAPPED READS

|                                      |       |       |       |       |
|--------------------------------------|-------|-------|-------|-------|
| % of reads unmapped: many mismatches | 0.00% | 0.00% | 0.00% | 0.00% |
| % of reads unmapped: too short       | 1.39% | 1.33% | 1.40% | 1.38% |
| % of reads unmapped: other           | 0.03% | 0.03% | 0.03% | 0.03% |

**Table S3.** An Excel spreadsheet listing differentially regulated genes.

**Table S4.** An Excel spreadsheet showing GO-term enrichment.

**Table S5.** An Excel spreadsheet showing transcriptome comparison.

**Table S6.** Conservation of *vit* gene sequences used in RNAi experiments.

| gene targets | RNAi          |              |              |              |
|--------------|---------------|--------------|--------------|--------------|
|              | <i>vit-1</i>  | <i>vit-3</i> | <i>vit-4</i> | <i>vit-5</i> |
| <i>vit-1</i> | 100%          | ns           | 80% (98bp)   | 80% (123bp)  |
| <i>vit-2</i> | 94% (1025 bp) | ns           | 80% (99bp)   | 81% (123bp)  |
| <i>vit-3</i> | ns            | 100%         | 99% (2421bp) | 94% (1125bp) |
| <i>vit-4</i> | ns            | 98% (2364bp) | 100%         | 97% (1075bp) |
| <i>vit-5</i> | ns            | 97% (2267bp) | 98% (2397bp) | 100%         |
| <i>vit-6</i> | ns            | ns           | ns           | ns           |

ns: no significant identity observed.

## SUPPLEMENTARY FIGURES

**Figure S1.** Expression profile of Wnt ligands, receptors, and target genes.

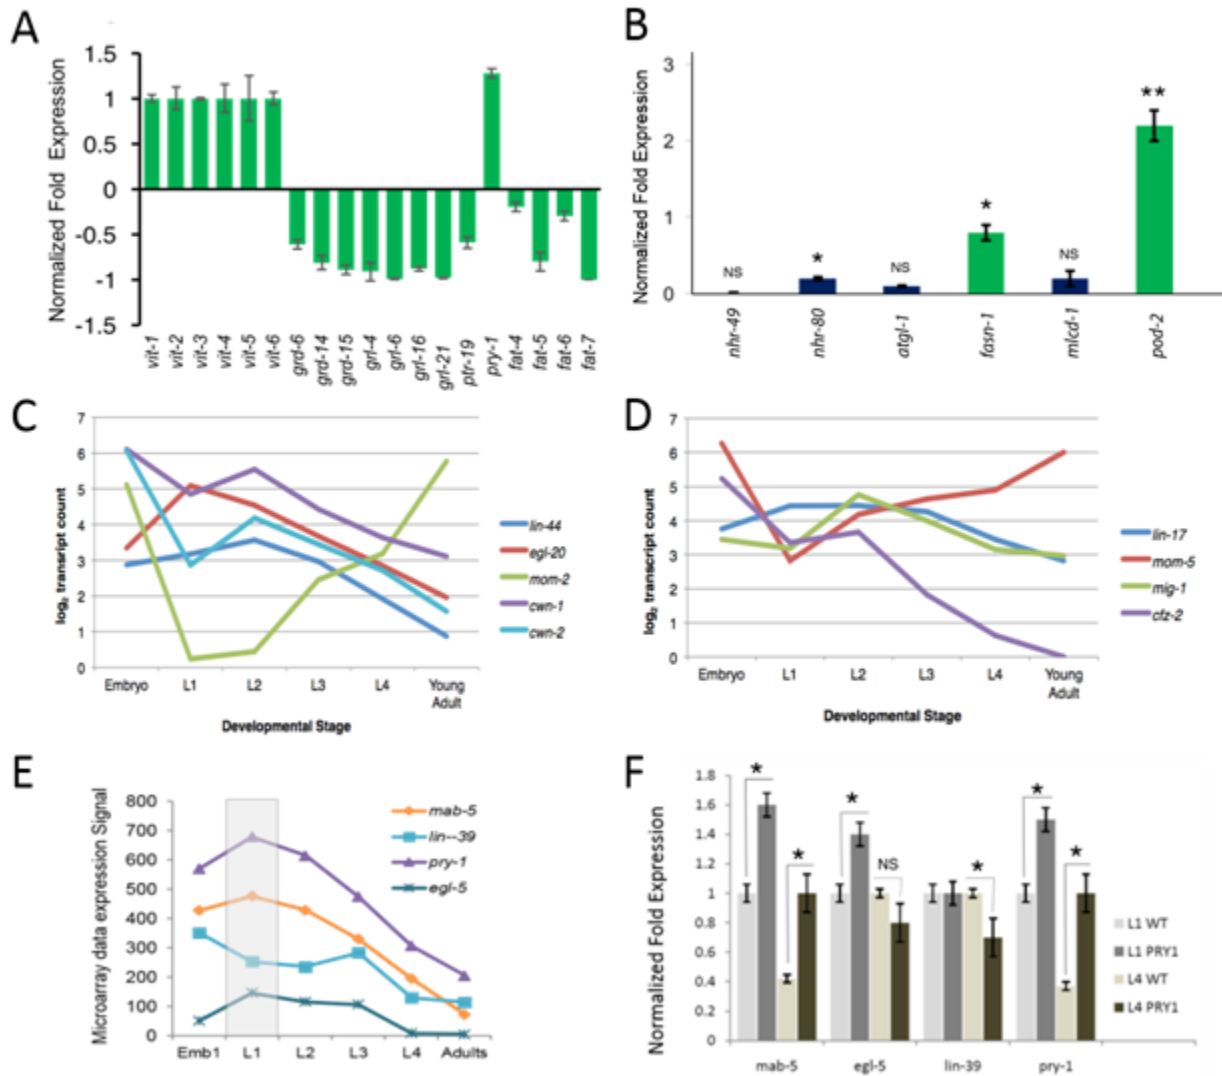

**Figure S2.** Overview of lipid metabolism and genes with altered expression in *pry-1(mu38)*.

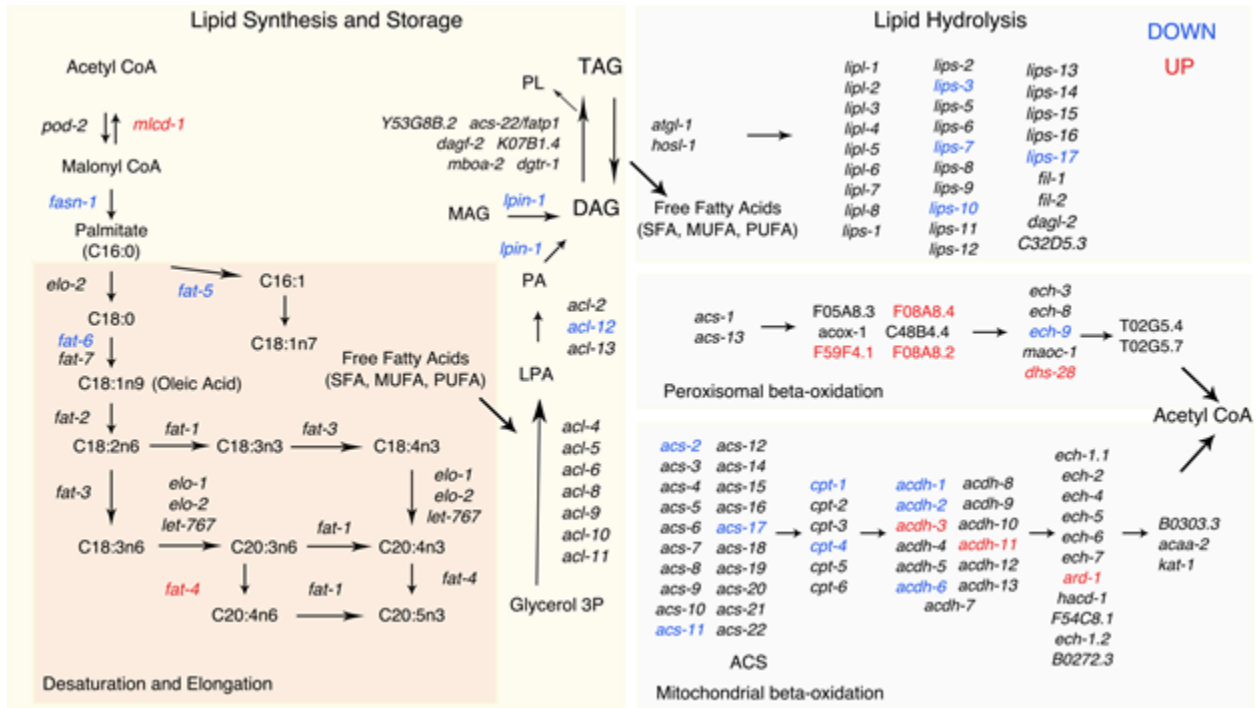

**Figure S3.** Lipid levels in *pry-1(mu38)* and *vit* mutants.

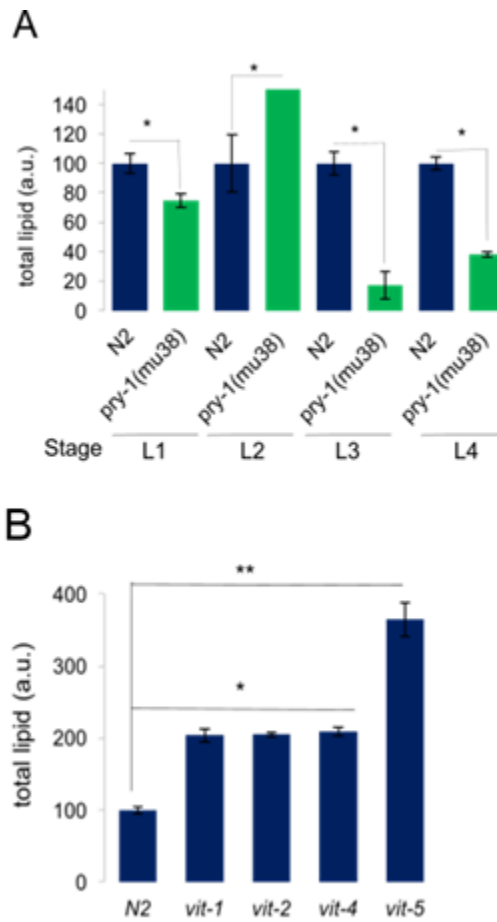



**Figure S4.** *vit-1* RNAi Knocks down *vit-2* transcript level.

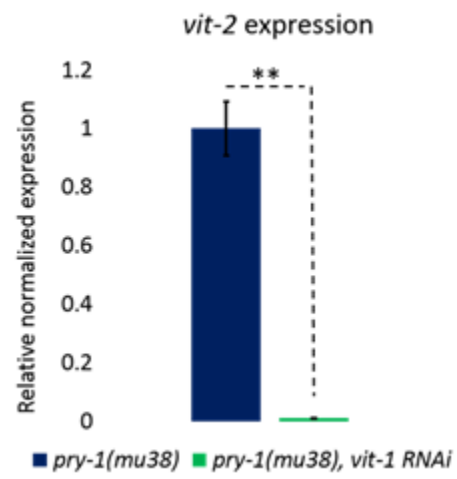

**Figure S5.** Relative fatty acid abundance in *pry-1(mu38)*.

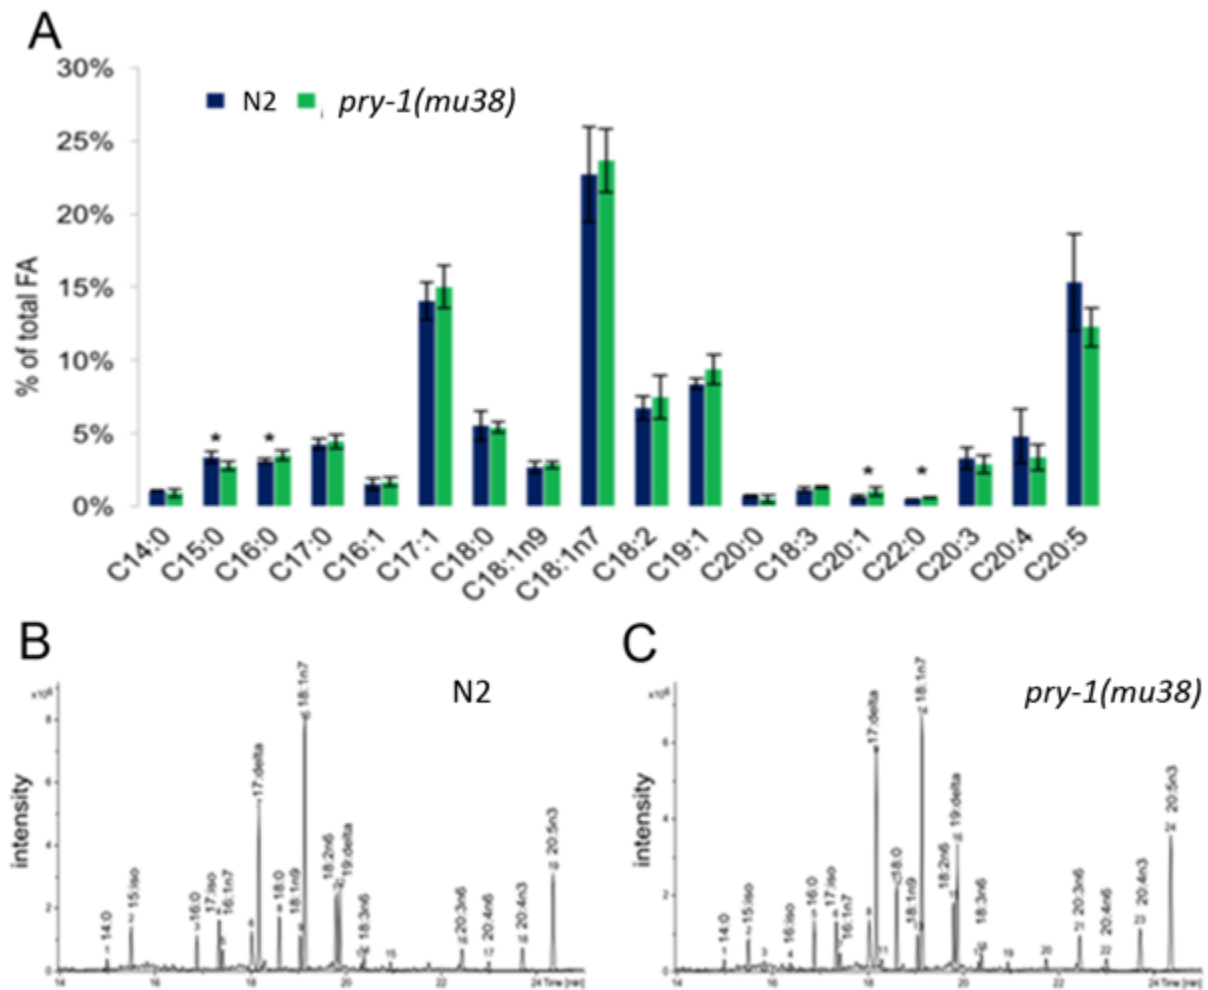

**Figure S6.** Lipid staining and quantification in *bar-1*, *pop-1*, and *dNT-bar-1* animals.

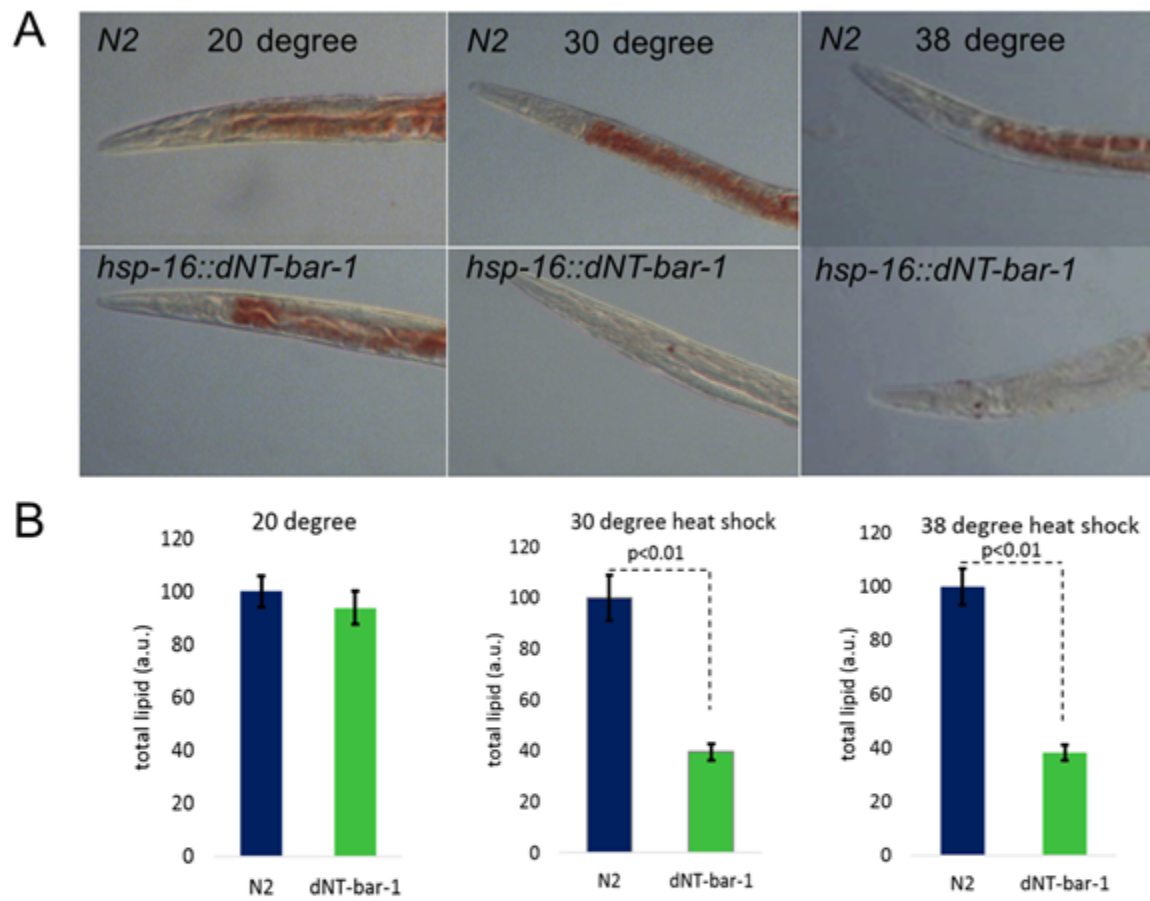

Source: https://www.biorxiv.org/content/10.1101/289462v1.full.pdf
